1 **Short title:** Nano-particles seed early embolism in stems

2

3 **Corresponding author:**

4 Dongmei Yang,

5 College of Chemistry and Life Sciences, Zhejiang Normal University, Jinhua 321004,

6 China

7 E-mail: [yangdm@zjnu.cn](mailto:yangdm@zjnu.cn), tel +86 15268640708

8

9

10 **Stem embolism vulnerability curve depends on methods used: is there a fifth**  
11 **mechanism of cavitation?**

12

13 Guoquan Peng<sup>1</sup>, Lei Cao<sup>1</sup>, Zhiyang Ren<sup>1</sup>, Zhao Liang<sup>1</sup>, Guo Yu<sup>1</sup>, Dongmei Yang<sup>1\*</sup>,

14 Melvin T. Tyree<sup>1</sup>

15

16 <sup>1</sup>College of Chemistry and Life Sciences, Zhejiang Normal University, Jinhua 321004,

17 China

18 \*Corresponding authors

19 Dongmei Yang, e-mail: [yangdm@zjnu.cn](mailto:yangdm@zjnu.cn), tel +86 15268640708

20

21

22 **One sentence Summary:**

23 Nano-particles induced early cavitation in species with vessel lengths about ¼ the stem  
24 length used in all centrifuge rotors, and the origin of nano-particles might be from living  
25 cells nearby vessels

26

27 **Author contributions**

28 D.Y. and M.T. conceived the research plans; G.P. and D.Y. supervised the experiments;  
29 G.P. performed most of the experiments and Z.L. performed staining experiments on  
30 *Robina* in Yangling; L.C., Z.R and G.Y. performed the experiments for species in Jinhua.  
31 D.Y. and G.P. analyzed data and wrote the manuscript; M.T. revised the manuscript.  
32 D.Y. agrees to serve as the author responsible for contact and ensures communication.

33

34 **Responsibilities of the author for contact**

35 The author responsible for distribution of materials integral to the findings presented in  
36 this article in accordance with the policy described in the Instructions for Authors  
37 (<https://academic.oup.com/plphys/pages/General-Instructions>) is Dongmei Yang

38

39 **Finding information**

40 This research was supported by grants of the National Natural Science Foundation of  
41 China (No. 31770647), the Natural Science Foundation of Zhejiang Provincial (China)  
42 (LY19C150007).

43

44 \* Correspondence author:

45 Dongmei Yang, e-mail: [yangdm@zjnu.cn](mailto:yangdm@zjnu.cn)

46

47

48

49

50

51

52

53

54

55

56

57 **Abstract**

58 A long-established ecological paradigm predicts a functional relationship  
59 determining vulnerability to cavitation: vulnerability increases with vessel hydraulic  
60 efficiency and vessel diameter. Even within a species, big vessels cavitate before small  
61 ones.

62 Some centrifuge methods for measuring vulnerability are prone to artifacts due to  
63 nano-particles seeding early embolism, as the particles are drawn into vessels during  
64 measurements. Both the Sperry and Cochard rotors are prone to early cavitation due to  
65 nano-particles drawn into long and wide vessels in *Robinia pseudoacacia* and *Quercus*  
66 *acutissima*, whereas extraction centrifuge methods produce vulnerability curves more  
67 resistant to cavitation.

68 Sufficient nano-particles pass through the stems to seed early embolism in all rotor  
69 designs. For several years, people have thought that early embolism is induced by nano-  
70 particles present in laboratory water. One new hypothesis is that the origin of nano-  
71 particles is from cut-open living cells but a much bigger study including many species is  
72 required to confirm this idea. This paper confirms the hypothesis in comparisons between  
73 short-vesselled *Acer*, and long-vesselled *Robinia*, and *Quercus*. Our new results and a  
74 review of old results justifies bigger study.

75 Hypothetical nano-particles might explain why different methods for measuring  
76 vulnerability curves cause different  $T_{50}$  = tensions causing 50% loss of hydraulic  
77 conductivity. Hence the hypothesis for future research should be that the open-vessel  
78 artifact is consistent with ‘long’ vessels surrounded by cut open living cells.

79

80

81 **Key words:** vulnerability curves, nano-particles, *Robinia pseudoacacia*, centrifuge  
82 techniques, recalcitrant curves, origin of nano-particles

83

## 84 Introduction

85

86 Water transport in land plants is fundamentally unstable, and the results in this paper and  
87 the recent literature enhance our understanding of the structural paradigms driving the  
88 evolution of xylem anatomy that permits metastable water transport. The Cohesion-  
89 Tension Theory advanced by Dixon and Jolly (1897) proposed that water is transported  
90 in a quasi-stable tensile status (Tyree, 1997). The concept of liquids having a tensile  
91 property is anathema to mechanical engineers and physicists because solids, by  
92 definition, have tensile properties, but liquids, by definition, have no tensile properties;  
93 nevertheless, plants seem to succeed in tensile water transport down to negative pressures  
94 of -12 MPa, but more typically in the range of -1 to -3 MPa (Tyree and Zimmermann,  
95 2002; Cochard et al., 2013). Loss of hydraulic conductivity,  $K_h$ , in stems occurs because  
96 of cavitation-induced water loss from xylem conduits. The tensile strength of water in  
97 xylem is measured in terms of the tension required to reduce hydraulic conductivity by  
98 50%,  $T_{50}$ . In this paper  $T$  is positive having pressure units equal to  $-P$ , where  $P$  is the  
99 absolute pressure of water. Hence water at 0.1 MPa absolute pressure (water in a beaker)  
100 has a tension of -0.1 MPa, water held in a perfect vacuum has a tension of 0 MPa and  
101 water at -1 MPa absolute  $P$  has a  $T = +1$  MPa

102 It has long been assumed that centrifuges provide the fastest and most reliable way  
103 of measuring  $T_{50}$ . Fully hydrated stem segments are placed inside a specially designed  
104 rotor and spun in a centrifuge to induce embolism where the maximum tension,  $T_{max}$ ,  
105 occurs at the axis of rotation and falls in a bell-shaped curve (Fig. 1) to zero at two water  
106 surfaces where water held by cuvettes. The stems are supported by rotors with their ends  
107 emersed in water. However persistent questions have arisen concerning what is called the  
108 long-vessel artifact that seems to result in  $T_{50}$  that are arguably too low, compared to  $T_{50}$   
109 measured by other techniques (Cai et al., 2014; Wang et al., 2014; Yin et al., 2018; Du et  
110 al., 2019; Peng et al., 2019). There are two kinds of rotors in use for spinning in different  
111 models of centrifuges: (1) The traditional Sperry rotor is mounted in a floor-model  
112 centrifuge and can spin 3 stem segments simultaneously to induce embolism, but  
113 embolism, measured through loss of  $K_h$ , has to be measured outside the centrifuge (Alder

114 et al., 1997), which is sometimes called the static centrifuge method; and (2) the Cochard  
115 rotor that can spin only one stem segment at a time in a smaller table-top centrifuge but  
116 measurements of  $K_h$  can be performed while the stems spin (Cochard et al., 2005), hence,  
117 it is an *in situ* flow technique. These centrifuges are capable of rapidly and precisely  
118 measuring vulnerability curves, VC, which are plots of % loss of conductivity versus  $T$  at  
119 the axis of rotation. The long vessel artifact occurs in species with mean vessel length  
120 approaching the half-length of the stems being spun in a rotor (rotor diameter  
121 approximately 0.14 to 0.28 m long). The artifact produces vulnerability curves, VC,  
122 which have  $T_{50}$  at lower values than that measured by slower but more traditional  
123 methods, such as desktop dehydration of large shoots (1 to 2.5 m long) and by the  
124 staining methods.

125 The only way the water can sustain tension is when it is enclosed in some kind of  
126 pipe or chamber without an air space, i.e., only chamber walls and water. But the nature  
127 of the “chamber”, for example, a glass tube versus a plant vessel, makes a difference to  
128 the stability of the system before it cavitates and the water breaks to form two distinct  
129 liquid and gas phases. So far only four mechanisms of cavitation have been proposed: (1)  
130 Homogeneous nucleation inside a body of water (Briggs, 1950; Pickard, 1981), which  
131 occurs at about  $T \approx 100$  MPa. (2) Heterogenous nucleation at the surface of water filled-  
132 glass tubes curved into an s-shape and spun in a centrifuge (Briggs, 1950). In glass,  
133 cavitations occur at about  $T \approx 25$  MPa. (3) Adhesive failure at the surface cellulose vessel  
134 walls (Pickard, 1981; Tyree, 1997). (4) Air seeding at pit membranes between an  
135 embolized vessel adjacent to a water-filled vessel which occurs at -1 to -12 MPa and is  
136 often assumed to be the dominant mechanism in plants. In pits the air seeding is viewed  
137 as occurring in the irregular porous spaces between cellulose fibers of the pit membranes.  
138 Pit membranes occur 100 times per m in a short vessel (0.01 m long) and less frequently  
139 in long vessels >0.2 m up to 1 or more m long (Tyree and Zimmermann, 2002). The  
140 “tensile” strength of these porous spaces is thought to be related to the surface tension of  
141 water,  $\tau$ , which can support an air-water interface with a radius of curve given by  $T \approx$   
142  $2\tau/r$ , where  $r$  is the effective radius of curvature of water. A value of  $T = 1$  to 10 MPa can  
143 be supported by a radius of curvature of 100 to 10 nm, respectively.

144 This paper addresses the recent literature about ‘long vessel artifacts’ wherein the  $T_{50}$   
145 measured on stems of long-vessel species in a centrifuge is substantially smaller than  $T_{50}$   
146 measured outside the centrifuge, e.g., bench top dehydration of shoots > 2 times longer  
147 the maximum vessel length. The study is performed in more precise centrifuges with  
148 advanced temperature control available in Chinese-built centrifuges to obtain more  
149 consistent results

150 The value of  $T_{50}$  tends to decline with increasing vessel diameter or vessel surface  
151 area (Hacke et al., 2006), and vessel length tends to increase with vessel diameter (Cai  
152 and Tyree, 2010; 2014). Until recently, the dominant hypothesis to explain these  
153 relationships is the air-seeding hypothesis of the mechanism of embolism via pit pores.  
154 The air seeding hypothesis implies that once some vessels have embolized at a given  
155 tension,  $T_i$ , that no more embolisms will occur until a higher tension,  $T_f > T_i$  is applied. It  
156 is already known that repeated measurement of  $K_h$  in a Cochard rotor at the same tension  
157 induces more loss of  $K_h$  (Wang et al. 2014).

158 In this paper we will discuss previous literature on the open-vessel artifact and then  
159 examine the merits of a 5<sup>th</sup> hypothesis for embolism. We propose that nano-particles seed  
160 at least some cavitations at tensions below the tension causing embolisms via air seeding  
161 at pit membranes. But this happens only in cut open vessels, because the proposed nano-  
162 particles are too large to pass from soils to fine roots in intact plants and too big to pass  
163 through pit membranes between adjacent vessels in cut branches. We also propose that  
164 new nano-particles are introduced after each cycle of spinning in a Sperry-type rotor then  
165 measuring  $K_h$  in a low-pressure flowmeter, or when injecting water for a measurement in  
166 a Cochard-type rotor. We imagine that nano-particles occur at some moderate  
167 concentration in water (particles per ml) but not so common that they enter all cut open  
168 vessels in anyone measuring cycle, otherwise all vessels would embolize by the first or  
169 second spin.

170

## 171 **Results**

### 172 *Vessel volumes and dimensions*

173 Figure 2 shows the cross-sectional area of injected rubber in stem sections versus the  
174 distance from the injection surface to the cross-section of *Robinia* samples in Yangling.

175 The dashed line represents the total volume of injected rubber computed from the integral  
176 of the best fit line times the distance. The arrows indicate the volume to the center of the  
177 small and large rotors. The total volume of all vessels can be estimated by the y-intercept  
178 of the solid-line plot times the stem length. For the stems lengths used in the two rotors,  
179 the values are 0.341 and 0.651 ml for the small and large stems, respectively. In  
180 comparison, the total water volume extracted into the cuvettes by 3 MPa tension was  
181  $0.83 \pm 0.07$  (N=4) and  $1.08 \pm 0.16$  (N=16) ml for the small and large rotors, respectively.  
182 These extraction values are approximately double the volume of embolized vessels at 3  
183 MPa; the first half of the extraction occurred from living cells before cavitation/loss of  
184 vessel water began (Du et al., 2019; Peng et al., 2019). During typical  $K_h$  measurements,  
185 after a spin, the volume of water flowing into the vessels generally exceeded the likely  
186 volume of water-filled vessels by a factor of 2 to 4 except near the end of vulnerability  
187 curves when the volume of water needed to measure  $K_h$  was nearly equal to the volume  
188 of water in the non-embolized vessels. So, at the end of each measuring cycle the water in  
189 the conducting vessel was replaced with ‘fresh water’; the significance of this will be  
190 address in the discussion.

191 Figure 3A demonstrates that the mean vessel diameter of the injected vessel  
192 increased with the distance from the injection surface of *Robinia* samples in Yangling.  
193 This is consistent with the notion that small-diameter vessels are shorter than larger-  
194 diameter vessels (Cai et al., 2010). The range of means was not large, i.e., from about 60  
195 to 74  $\mu\text{m}$ . Fig. 3B shows the mean vessel length versus the mean vessel diameter by bin  
196 size classes. Many of the short vessels would reach the axis of rotation of the small rotor,  
197 and the largest vessels would reach the axis of rotation of the large rotor. It is worth  
198 mentioning that vessel length in stem segments in *Robinia* change dramatically between  
199 trees or even between branches on the same tree (Wang et al. 2014), so we measured  
200 vessel length of the same stem segments that were spun in the Sperry rotors in this study.

201 Mean vessel length and vessel diameter with standard error (SE) of all species were  
202 shown in Table 1. The results shown that *Acer* has the shortest vessel length ( $2.25 \pm 0.09$   
203 cm) within all species, and it can be defined as short vessel species because it is shorter  
204 than radii of both big and small rotor (13.7 cm vs. 7.2 cm respectively). The mean vessel  
205 length of *Robinia* was close to the radius of big rotor, but larger than radius of small

206 rotor. *Quercus* has the longest mean vessel length within all species, which was longer  
207 than the radius of big rotor. The vessel diameter comparison had the sequence as *Acer* <  
208 *Robinia* (Yangling) < *Robinia* (Jinhua), *Quercus*.

209

210 *Early embolism in cut-open vessels spun repeatedly at the same tension.*

211 The purpose of this experiment was to test the underlying assumption of people who  
212 use rotors to spin stem segments at different tensions. In preliminary experiments when  
213 Sperry (Alder et al., 1997, Davis et al., 1999) tested their new rotor they determined how  
214 long the samples need to spin to get a stable result. But our results show that the answer  
215 turns out to be dependent on vessel length and when vessels are too long then quite  
216 unexpected results occur. In our *Robinia* experiments in Yangling, the same stem was  
217 repeatedly spun at 0.25 MPa tension, and after each spin, the  $K_h$  was measured and the  
218 percentage loss of hydraulic conductivity,  $PLC$ , was computed. If the air-seeding  
219 hypothesis is the dominant mechanism of cavitation, then there should have been an  
220 initial drop in  $PLC$  after the first spin with little or no additional drop after successive  
221 spins. Contrary to this hypothesis, the  $PLC$  decreased by equal amounts between spins  
222 (Fig. 4A). This was further confirmed by the experiments in which the rotors were  
223 deliberately filled with unequal water masses ( $500 \pm 1$  mg for the small rotor and  $2000 \pm$   
224  $1$  mg for the large rotor). At the end of the spins, the water masses had equilibrated to  
225 within  $\pm 10$  mg; hence, during the 6-min spin, an additional 0.5 or 2 g had flowed through  
226 the stem segments. The impact of the additional flow during the spin was to increase the  
227 decline of  $K_h/K_{max}$  after each spin. When the experiment in Fig. 4A was repeated in the  
228 large rotor (Fig. 4B), all the declined values of  $K_h/K_{max}$  were less than in the small rotor,  
229 both with and without equal masses of water in the cuvettes before the spin. The y-  
230 intercepts of both linear regressions in Fig. 4 were significantly less than 1 based on 95%  
231 confidence intervals (Table 3), which indicated that some additional nano-particles go  
232 into stem during flush rather than during spinning. The additional water passing through  
233 the sample *Robinia* segments (2 ml extra during each spin in large rotor) is similar to the  
234 amount of water passed through the segments when  $K_h$  is measured in the LPFM, but the  
235 passage of water while spinning seems to increase the loss of  $K_h$  after each spin (solid  
236 triangles versus open circles).



237 We repeated these experiments years later at ZJNU with three species with short to  
238 long vessels relative to the diameter of the large Sperry rotor. These results are shown in  
239 Fig. 4C. *Robina* and *Quercus* both shown a significant decline of  $K_h/K_{max}$  with spin times,  
240 but in *Acer*  $K_h/K_{max}$  was constant. The vessel dimensions in these species were shown in  
241 Tables 1.

242 Location of living cells viewed in the cross section of *Acer*, *Robinia* and *Quercus*  
243 were shown in Fig. 5. Living cells (ray cells and xylem parenchyma) were stained black  
244 in the micrograph. All species have abundant ray cells near some of vessels, but *Quercus*  
245 and *Acer* have lots of xylem parenchyma compared to *Robinia*.

246

247 *T<sub>50</sub> values measured by bench-top dehydration versus the Sperry rotor*

248 Tentatively, Fig. 4 suggests that vulnerability curves, VC, of long-vessel species are  
249 determined by more than seeding of embolisms by the biggest pore out of all the pores in  
250 all the pit membranes of any given vessel. PLC is somehow the consequence of the  
251 volume of water that passes through the stem segments for long-vessel species but not for  
252 short-vessel species. This notion is also confirmed by the results in Fig. 6. Here we show  
253 that different vulnerability curves are obtained for *Robinia* segments depending on the  
254 method used. For the small rotor, if each segment is spun only once at any given tension  
255 (one-sample-one-tension method),  $T_{50} = 2$  MPa. In contrast  $T_{50} = 1$  MPa when each  
256 segment being spun 6 minutes and 10 different tensions (traditional method) in the small  
257 rotor (Fig. 6A). Similar differences were found in the large rotor (Fig. 6B).

258 A plot of embolized vessels at the axis of rotation of big rotor visualized by staining  
259 (diamonds) is shown in Fig. 6B. Less than 10% of the vessel cross-sectional area was still  
260 cut open at the axis of rotation (see Fig. 2A solid line). Hence when the staining method  
261 is used to visualize PLC near the axis of rotation, less than 10% of the embolism from  
262 unstained versus stained vessels can be anomalous embolism due to cut open vessels. The  
263  $T_{50}$  values based on staining were significantly higher compared to other Sperry methods  
264 ( $T_{50} = 4.1 \pm 0.4$  SE in staining method). This suggested that the higher PLC values in the  
265 circle points were caused by anomalous embolisms in cut-open vessels. Independently  
266 obtained staining experiments from our laboratory have confirmed that the % of  
267 embolized vessels falls off approximately linearly from the base to the apex (Yin et al.,

268 2018). The % embolism observed from staining at tensions of 2, 3.5 and 4.25 MPa were  
269 all significantly lower than the open and closed circle points in Fig. 6B (all  $P < 0.01$ ).

270

## 271 **Discussion**

272 Many of the results above are similar to results obtained by Wang et al. (2014) using  
273 *Robinia* stem segments mounted in a Cochard rotor in a Chinese built ‘cavitron’, which  
274 has superior temperature control. Repeated measurements of  $K_h$  were made on the same  
275 branch spinning at 900 RPM ( $T = 0.072$  MPa), and Wang found that after many  
276 measurements over 200 minutes that  $K_h$  reached a stable value (Circles in Fig. 7A), but in  
277 the first 25 minutes the  $K_h$  fell linearly with time when measurements were done every 5  
278 minutes (Squares in Fig. 7A). *Robinia* was a fortunate choice of species because there  
279 was a high diversity of vessel length from branch to branch. Hence within the same  
280 species Wang was able to study the impact of vessel length on the open vessel artifact.  
281 Fig. 7B, shows the impact of vessel length on stable  $K_h$  after many measurements (similar  
282 to Fig. 7A) for about 200 minutes. These results for the Cochard rotor and the results in  
283 the Sperry rotor in this study suggest to us that the phenomenon is independent of the  
284 rotor type but strongly dependent on vessel length. One possible interpretation concerns  
285 hypothetical nano-particles.

### 286 *The origin of hypothetical nano-particles*

287 We had two hypotheses about the origin of the hypothetical nano-particles, i.e.,  
288 laboratory water or cut stem surfaces. The first idea was that the nano-particles were  
289 present in laboratory water and would enter the vessels in proportion to the total volume  
290 flow. The flush introduced >100-fold more water volume into cut-open vessels than the  
291 typical volume flow during hydraulic conductivity measurements. If the origin of nano-  
292 particles was the filtered laboratory water, we would expect a disproportionate (> 100  
293 times) more embolism in the first measurements in Fig. 4 than in subsequent  
294 measurements, but that was not found when repeated measurements of *PLC* were made at  
295 the same tension. The linear decrease between measurements was consistent with  
296 laboratory water being the origin of embolisms, but the y-intercept was inconsistent. The  
297 y-intercepts suggested a non-significant increase in early embolisms after the flush and

298 the first spin compared to later spins, because the PLC changes between successive  
299 measurements were not significantly different from the uncertainty of the y-intercept.

300 Alternatively, living cells cut open near cut open vessels might be the source of  
301 nano-particles as these particles emerge at a constant rate. Figure 8 is a diagrammatic  
302 model (not to scale) explaining the origin of nano-particles from cut open living cells  
303 surrounded by semipermeable membranes (red lines). The osmotic pressure of the living  
304 cell contents is likely to be 1 to 3 MPa, but the osmotic pressure of the LPFM fluid is  
305  $<0.1$  MPa. Hence, osmotic water flow from the vessel across the membranes to the living  
306 cells (short yellow arrows) will push cell contents through the living cell lumen (long  
307 yellow arrows). The nano-particles (black circles) are presumed to always be present in  
308 the cytoplasm or are the degradation products of membrane-bound organelles that were  
309 pushed out by osmosis (yellow arrows) into the hypotonic water. Once organelles are in  
310 water, where water inflow will osmotically swell and burst the organelle. Water flow  
311 through the LPFM tubing (long black arrows) bends around low conductivity regions of  
312 the stem surface and then enters the vessel lumen as shown in Fig. 8 by the black arrows.  
313 This water flow near the surface picks up the cellular debris from the cut-open living  
314 cells and sweeps the debris into the vessel lumen. The discharge of nano-particles might  
315 last for hours. Membrane bound ‘organelles’ have been observed to emerge from cut  
316 stems and their swelling/shrinking and bursting due to changes in osmotic potential of  
317 bathing medium has been reported (Tyree et al., 1982); the primary purpose of Tyree et  
318 al. (1982) was to measure the kinetics of swelling and shrinking of emerging ‘organelles’,  
319 but MTT can confirm seeing such organelles breaking into components too small to see  
320 in a light microscope under oil-immersion optics when exposed to dilute solutions.

321 The ideas presented about nano-particles are also consistent with the data in Fig. 4C.  
322 Our hypothesis is that the long-vessel artifact requires both long vessels and a source of  
323 nano-particles. *Robinia* and *Quercus* have both long vessels and living cells near to  
324 vessels and demonstrate the long-vessel artifact; but although *Acer* has lots of living cells  
325 nearby the vessels by vessels are short (Fig. 5). Hence, there is no early embolism in *Acer*  
326 (see Fig. 4C and Table 2). More experiments on up to 10 species with long- and short-  
327 vessel length are probably necessary to confirm our hypothesis; hence we hope our

328 results will encourage studies of more species, beyond those we will do in the next year  
329 or two.

330

331 *Does the rotor design make a difference?*

332 The two centrifuge techniques in common use for measuring vulnerability curves differ  
333 primarily in their rotor designs, which determines when and where the  $K_h$  values are  
334 measured. In the Sperry rotor, three stems can be spun simultaneously, but the stems  
335 must be removed from the rotor for measuring  $K_h$  in a conductivity apparatus. Typically,  
336 the same stems are returned to spin at a higher tension. In the Cochard rotor, only one  
337 stem can be spun at a time, but  $K_h$  can be measured while spinning. Typically, 0.3 to 0.7  
338 g of water is injected into one cuvette depending on the optical system used to measure  
339 the movement of water from the injected cuvette. About two-thirds of the water injected  
340 into the cuvette moves through the stem while the  $K_h$  measurements are made in the  
341 Cochard rotor and the rest passes through the stem while the stem spins at the next higher  
342 tension. In this study, the amount of water passing through the stem during  $K_h$   
343 measurements was a little less (0.15 to 0.4 g) but still sufficient to displace all the water  
344 in the cut-open vessels of *Robinia* ( $\leq 0.12$  g, Fig. 2). Hence, neither rotor type avoids the  
345 hypothetical nano-particle problem.

346 Our hypothesis was that the water used to measure  $K_h$  swept nano-particles into  
347 vessels that could induce embolism at quite low tensions. Hence, if repeated  $K_h$   
348 measurements were made at the same tension, then there should be a linear or curvilinear  
349 rate of decline in  $K_h$  that depends on the number of measurements of  $K_h$ , which injected  
350 new nano-particles. In the *Robinia* study of Yangling, the linear rate of decline in terms  
351 of  $K_h/K_{max}$  was 6% or 4% per spin for the small and large rotors, respectively, in equal  
352 water level experiment (circles in Fig. 4A, B). When the Sperry cuvettes were loaded  
353 with extra water in one end so that flow occurred during spinning, the rate of decline of  
354  $K_h/K_{max}$  was increased initially to 15% and 9% per spin for the small and large rotors,  
355 respectively (triangles in Fig. 4A, B).

356 Our hypothesis was that nano-particles could potentially seed an embolism at a  
357 pressure below the air-seeding value in the pit membrane. If this is true, then there should  
358 be more embolisms on the upstream side of stem segments because nano-particles cannot

359 pass through pit membranes. This has been confirmed by Yin et al. (2018); the number of  
360 embolized vessels was found in *Robinia* to linearly decrease with distance from the base  
361 to the apex after spinning stems to a tension of 1 MPa, which is sufficient to cause 50%  
362 PLC (Fig. 6). These findings reinforced the notion that nano-particles were filtered out by  
363 the pit membranes as water passed between vessels.

364 At the time of the experiments by Wang et al. (2014), our thinking was that the  
365 ‘nano-particles’ were in fact tiny air bubbles formed during injection of water into the  
366 source cuvette in the Cochard rotor. So, we redesigned the rotor to isolate the measuring  
367 cuvette from the injection cuvette by various techniques, but none of the techniques  
368 eliminated the anomalous early loss of  $K_h$  at low tensions (Du et al., 2019). If the nano-  
369 particles are always present in laboratory water (even well-filtered water) or if the nano-  
370 particles are expelled from the cut-open living cells of recently cut stems, then the way to  
371 prevent the entry of nano-particles is to eliminate the  $K_h$  measurements and measure  
372 instead the water extraction volume from embolized conduits. This approach gives more  
373 valid vulnerability curves (Pivovarov et al., 2016; Peng et al., 2019), but the  
374 interpretation of the results in terms of PLC is complicated by the fact that part of the  
375 volume extraction is coming from tissues other than the lumens of xylem conduits.

376 It is now clear that vulnerability curves generated by both the Cochard rotor, and the  
377 Sperry rotor are subject to so-called ‘open vessel’ artifacts in long-vessel species  
378 (Cochard et al., 2013; Martin St-Paul et al., 2014; Torres-Ruiz et al., 2014; Wang et al.,  
379 2014). The nature of this artifact was consistent with the hypothesis that when  
380 vulnerability curves were measured on excised stems, a significant fraction of the  
381 embolisms was induced by a 5<sup>th</sup> mechanism not previously considered by Tyree (1997)  
382 and Tyree and Zimmerman (2002), namely, early cavitation induced by nano-particles  
383 either generated at the cut surface of stems or always present in laboratory water. The  
384 data in this paper and in Wang et al. (2014) were entirely consistent with the hypotheses  
385 at the end of the introduction.

386 The so-called ‘gold standard’ of techniques for measuring vulnerability curves is the  
387 bench top dehydration method. This method works because whole shoots are harvested at  
388 a length equal to >2 times the maximum vessel length, and then cavitation is induced by  
389 slow bench top dehydration. The measurements of  $K_h$  are made after dehydration to a

390 tension typically measured with either a pressure chamber or a stem hygrometer. After  
391 the  $K_h$  is measured on stem segments (far removed from the cut-open vessels at the base  
392 of the shoot), the stems are flushed to get maximum conductivity,  $K_{max}$ , from which PLC  
393 is calculated from  $100(1-K_h/K_m)$ . The principal disadvantages of this method are: (1) that  
394 in some cases, the native PLC of some trees might be 10 to 40%, so bench top  
395 dehydration curves do not include the part of the vulnerability curve that is eliminated by  
396 native drought events and (2) the SEM values are often larger than in the centrifuge  
397 techniques thus making vulnerability curves quite inaccurate. The staining data in Fig. 6B  
398 were also a type of gold standard because these data were obtained totally by extracting  
399 water and then staining. Figure 9 is a replot of Fig. 6 but includes two recent vulnerability  
400 curves obtained by the benchtop dehydration method from our former laboratory in  
401 Northwest A&F University (Wang et al., 2014; Yin et al., 2018) as well as by the water  
402 extraction method (Peng et al., 2019).

403 The results of this study plus others from our laboratory (Wang et al., 2014; Du et  
404 al., 2019, Peng et al., 2019) suggest an urgent need to revisit the now-classic experiments  
405 by the Sperry group (Sperry et al., 2005; Wheeler et al., 2005; Hacke et al., 2006); these  
406 publications were the first to document well the relationships between xylem safety  
407 against cavitation ( $T_{50}$  where a large value is a safe value) and various measurements of  
408 vessel diameter or cross-sectional area or parameters that arguably could be related to  
409 vessel size (such as xylem resistivity). The arguments about why the various parameters  
410 might correlate in the above papers are beyond the scope of this paper, but of the 27  
411 species in the meta-analysis (Hacke et al., 2006), seven had vessel lengths >10 cm and  
412 two were slightly smaller but still close to the half-length of the stem segments in the  
413 small Sperry rotor used to determine  $T_{50}$ -values. Of those long-vessel species, 7 species  
414 had  $T_{50}$  values <2.8 MPa. In general, large diameter vessels tend to also be long vessels  
415 (Hacke et al., 2006; Cai and Tyree, 2014); hence, many  $T_{50}$  values of large diameter  
416 vessel may be inaccurate and need to be re-measured to see if the conclusions of the three  
417 papers quoted from Sperry's laboratory are still correct. What may be discovered is that  
418 the  $T_{50}$  of species with big vessels has been underestimated, but new results may not  
419 improve any correlations between  $T_{50}$  and measures of xylem hydraulic efficiency. A  
420 recent and much larger meta-analysis (Gleason et al., 2016) shows quite weak evidence

421 of such tradeoffs. But the lack of correlations in Gleason et al. (2016) may change if a  
422 more reliable method, like the water extraction method (Peng et al., 2019) proves to work  
423 for a wide range of species.

424

## 425 **Conclusions**

426 We wish to end with a positive note. Both the Sperry and Cochard rotors are valid  
427 techniques for measuring the VCs of species with short conduits. The criterion used for  
428 selection of short-vessel species might be that < 20% of the conductivity is due to vessels  
429 longer than the distance from the axis of rotation to the water levels in the cuvettes. This  
430 criterion is met by all conifers because of their tracheid lengths of less than 3 mm and by  
431 65 to 75% of the short-vessel angiosperm species studied so far. But the VCs of all  
432 species with long vessels need to be remeasured by advanced methods to see if the  
433 findings of this paper are generally true.

434 The two r-shaped curves on the left side of Fig. 9, compared to the s-shaped  
435 ‘normal’ curves, are often thought to be wrong and referred to as recalcitrant  
436 vulnerability curves caused by ‘open vessel artifacts.’ We now have a stronger reason to  
437 believe that the recalcitrant behavior is caused by nano-particles generated from the cut  
438 surface of stems (Fig. 8). But even if the open vessel artifact is NOT caused by nano-  
439 particles the results still stand. More than just tension,  $T$ , determines the PLC in  
440 vulnerability curves measured in centrifuges and something different happens during  
441 bench top dehydration. The way forward might be to remeasure VCs of all species with  
442 vessels longer than the radius of the rotors by using more reliable methods, for example  
443 the water extraction method (Peng et al. 2018). This may require years of work but might  
444 lead to results of more ecological significance than found in the literature meta-analysis  
445 by Gleason et al. (2016).

446

## 447 **Materials and methods**

### 448 *Plant materials and sampling*

449 In the summer of 2017, *Robinia pseudoacacia* L. current-year stem segments near the  
450 Weihe River in Yangling, Shaanxi, China (34°16′ N, 108°4′ E), were harvested from  
451 sun-exposed branches. Shoots 1- to 1.5-m long and with a 9-mm basal diameter were

452 excised, sprayed with water, and then enclosed in black plastic bags with wet paper and  
453 transported to the laboratory within 0.5 h. The shoot base was recut under water; leaves  
454 and thorns were excised, and then the branches were rehydrated under water for 0.5 h. In  
455 2019, *Acer palmatum* Thunb, *Robinia pseudoacacia* L., and *Quercus acutissima* Carruth,  
456 all collected at Zhejiang Normal University, Jinhua, China (29°07' N, 119°38' E) and  
457 used for the measurements done on *Robinia* collected in Yangling. The mean vessel  
458 length, vessel diameter, VCs with the large and small Sperry rotor, and VCs by benchtop  
459 dehydration were measured.

460

#### 461 *Hydraulic conductivity measurements*

462 Stem segments 275-mm or 144-mm long and 6.5 to 7.5 mm in diameter were recut under  
463 water, and then the scars from excised leaves and thorns were sealed by super glue to  
464 reduce evaporation. The stem segment ends were re-trimmed with a fresh razor blade and  
465 flushed with 0.01 M KCl (prepared with ultrapure water) at an applied pressure of 150-  
466 170 kPa pressure for 4-10 min for different species to ensure maximum hydraulic  
467 conductivity,  $K_{max}$ .

468 After spinning stems in a centrifuge, the  $K_h$  of stem segments was measured with a  
469 low-pressure flow meter (LPFM). We followed the protocol in Sperry et al. (2012) in  
470 which the background flow was measured immediately after the spin and again after the  
471  $K_h$  measurement. The background flow is attributed to tissue desiccation in the Sperry  
472 rotor, so the segments typically rehydrate while  $K_h$  is measured.  $K_h$  was always corrected  
473 for background flow, but usually the correction was less than 5%. The typical applied  
474 pressure was about 1.5 kPa (~15 cm of water head) for all species, which was low enough  
475 to avoid displacement of embolisms by moving water in vessels.

476

#### 477 *Centrifuge measurements and vulnerability curves*

478 Sperry rotors were used for inducing cavitation of stem segments; large and small rotors  
479 for 27.4 and 14.4 cm stems, respectively, were fabricated according to specifications in  
480 Alder et al. (1997). For *Robinia* experiment in Yangling, before and after spinning, the  
481 cuvettes were weighed to compute water extraction mass by difference. Before spinning,  
482 water was added gravimetrically to  $\pm 1$  mg with a syringe. This experimental design



483 included equal and unequal water masses between the cuvettes. For the large rotor, 5 g of  
484 water was added in all cuvettes for the equal water level experiment, but 6 g versus 4 g  
485 was used for the unequal water level experiment in paired cuvettes. In the small rotor, 2 g  
486 of water was added in all cuvettes for equal water level experiments, but 2 g versus 1.5 g  
487 was used for unequal water level experiments in paired cuvettes. In 6 replicate  
488 experiments, equal water masses were used prior to each spin, and in 6 other replicates,  
489 unequal water masses were used as explained above during *Robinia* experiment in  
490 Yangling. The centrifuge was maintained at 25 °C, and all  $K_h$  measurements were done at  
491 25 °C.

492 In Jinhua, foam pads saturated with water were always used unless specifically stated  
493 otherwise in the results section, and the water mass was not measured. The pads were  
494 mounted in the vertical part of the cuvettes in the Sperry rotor. The function of the pads is  
495 to keep the cut surfaces of stem segments in better contact with water when the rotor was  
496 not spinning. While spinning, the pads are fully immersed in the water that has moved  
497 from the horizontal part of the cuvette to the vertical part by the centrifugal forces  
498 generated by the spin.

499 Both in Yangling and Jinhua, stems of all species were spun repeatedly at the same  
500 tension (0.25 MPa for 6 min) and removed for  $K_h$  determination and then spun again at  
501 0.25 MPa for a total of 10 cycles. In Jinhua, vulnerability curves were measured for 3  
502 species with big rotors. In addition, repeated spins with increasing tension were used as in  
503 the standard Sperry protocol, and each tension was maintained for 6 minutes. In some  
504 cases, the same stem was used at each tension (standard Sperry protocol), and in other  
505 experiments, new stems were used at each tension, for a total of 60 stems to measure 10  
506 different tensions (one-tension-one-stem).

507 In all experiments, the percentage loss of conductivity ( $PLC$ ) = 100%  $(1 - K_{h\text{-correct}}$   
508  $/K_{\text{max}})$ , and a Weibull function was used to fit the relationship between the  $PLC$  and  
509 xylem tension:  $PLC/100 = 1 - \exp[-(T/B)^C]$ , where  $B$  and  $C$  are curve fitting parameters,  
510 and they were obtained by minimizing the root mean square error ( $RMS_{\text{error}}$ ). The value of  
511  $T_{50}$  was then calculated from  $T_{50} = B [\ln(2)]^{1/C}$ .

512

513 *Vessel length and vessel diameter measurements*

514 Mean vessel length was measured by the air-injection method (see details in Pan et al.,  
515 2014). In *Robinia* the same stems used for VCs were removed and used for air injection  
516 measurement. But for *Acer* and *Quercus* different stems with similar diameter were  
517 measured by air-injection methods. The vessel diameter of *Robinia* in Yangling were  
518 measured on cross sections by light microscopy using the same stems used for vessel  
519 length measurement.

520 *Silicone rubber-injection method:* Vessel length is frequently measured by a rubber  
521 injection method. The replacement of water with rubber is analogous to the replacement  
522 of water with air because pit membranes can stop both. Our primary purpose was to  
523 estimate the volume of a cut-open vessel, which equals the volume of injected rubber, but  
524 this method can also be used to obtain vessel length.

525 After injection and hardening of the silicone rubber, stems were cross-sectioned at  
526 several distances (from 0.2 to 27 cm) from the injection surface until less than 1 or 2% of  
527 the vessels were filled with rubber. Sections 18- $\mu$ m thick were cut by a microtome (Leica  
528 RM 2235, Nussloch, Germany) and were mounted in water on a glass slide and placed on  
529 a microscope (Zeiss, Imager A.2 Göttingen, Germany) and photographed by UV light at  
530 50 $\times$  magnification for vessel cross-sectional area measurement and for the analysis  
531 described in detail in Cai et al., 2010; 2014; Pan et al., 2015; and Peng et al., 2019.

532 *Vessel diameter:* For *Robinia* in Yangling, the area of each rubber-filled vessel,  $A_i$ ,  
533 was measured by Image analysis software (WinCELL 2013; Regent Instruments Inc) and  
534 then summed to get  $A_r$  at each distance  $x$ . For all species in Jinhua, the cross-section of  
535 each sample was stained with 0.02% (w/v) basic fuchsin dying solution (detailed see  
536 Peng et al., 2020), and finally each vessel area,  $A_i$ , was measured by Image analysis  
537 software (WinCELL 2013; Regent Instruments Inc). Diameters were calculated from  
538  $D_i=(4A_i/\pi)^{0.5}$ .

539

540 *Visualization of embolized vessels by the stain method and corresponding VCs*

541 In Yangling, *Robinia* stem segments used for staining were prepared using the same  
542 method as that for measuring vulnerability curves. Stems were spun for 1 h at various  
543 tensions to cavitate vessels. After spinning, the central 2-cm segment near the axis of  
544 rotation of the stem was cut under water by cutting progressively from each end to

545 release tension until the last 2-cm segment was cut with a fresh razor blade. The staining  
546 method was like that described in detail by Wang et al. (2014), and Peng et al. (2019).  
547 After staining, segments were flushed with 0.01 M KCl at 130 kPa briefly to remove  
548 excess stain.

549 Then 18- $\mu\text{m}$  cross-sections were sectioned from the middle of the 2-cm segments.  
550 Sections were mounted in glycerin on glass slides and photographed under a microscope  
551 (Zeiss, Imager A.2 Göttingen, Germany) at 50 $\times$  magnification with a digital camera  
552 (Infinity 1-5C, Regent Instruments Inc., Quebec, Canada). Then, every stained  
553 (conducting) and unstained (embolized) vessel area ( $A_v$ ) in the whole cross-sections was  
554 measured by digital analysis software (Image-Pro Plus version 6.0). The few vessels with  
555 tyloses that were not included in the stained and unstained vessel areas.

556 Staining vulnerability curves were plotted based on the unstained vessel area and  
557 stained vessel area within the same cross-section at each tension. Percentage loss  
558 conductivity was computed from stained areas squared to give hydraulic weights,  $PLC_s$ :

$$559 \quad PLC_s = 100 \frac{\sum A_{u,v}^2}{(\sum A_{u,v}^2 + \sum A_{s,v}^2)}, \quad (1)$$

560 where  $A_{u,v}$  = the area of the  $i^{\text{th}}$  unstained vessel, and  $A_{s,v}$  = the area of the  $i^{\text{th}}$  stained  
561 vessel. Mean results were calculated from six to eight repeated stems.

562

### 563 *Presence of living cells near to vessels*

564 Living cells were confirmed by iodine staining for starch, and lignified cell walls were  
565 stained by basic fuchsin in the cross section of stems. Cross sections thickness was  
566 approximately twice the presumed biggest living cells dimensions, which were  
567 determined based on tangential and cross sections. All cross sections were 25  $\mu\text{m}$  thick  
568 for *Acer*, *Robinia* and *Quercus* and were mounted on slides, stained with iodine and basic  
569 fuchsin in sequence, viewed and photographed under a microscope (Leica, DM6B  
570 Wetzlar, Germany).

571

### 572 *Statistical analysis and replications*

573 Student's  $t$ -test was used for significance tests of PLC values at the given tension  
574 between traditional centrifuge method and one tension one stem method, and tests of  $T_{50}$   
575 values of *Robinia* between traditional centrifuge method and theory calculation based on

576 extracted method in Yangling. The 95% confidence intervals of  $T_{50}$  values in bench-top  
577 dehydration was calculated to compare with traditional Sperry centrifuge methods (Table  
578 2). ANOVA were used for mean vessel length and mean vessel diameter comparisons  
579 among different species.

580

## 581 **Acknowledgements**

582 P.G. and L.Z. thank the College of Forestry, Northwest A&F University, for laboratory  
583 space used during part of this research program, thank Yingjie Xiong, Xiaolin Wang for  
584 their assistance with anatomy measurements, also thank Dr. Yujie Wang providing  
585 helpful suggestions on writing. This research was supported by grants of the National  
586 Natural Science Foundation of China (No. 31770647), the Zhejiang Provincial Natural  
587 Science Foundation of China (LY19C150007).

588

589 **References**

- 590 **Alder NN, Pockman WT, Sperry JS, Nuismer S** (1997) Use of centrifugal force in the  
591 study of xylem cavitation. *J Exp Bot* **48**: 665-674
- 592 **Briggs LJ** (1950) Limiting negative pressure of water. *J Appl Phys* **21**: 721-722
- 593 **Cai J, Tyree MT** (2010) The impact of vessel size on vulnerability curves: data and  
594 models for within-species variability in saplings of aspen, *Populus tremuloides*  
595 Michx. *Plant Cell Environ* **33**: 1059-1069
- 596 **Cai J, Tyree MT** (2014) Measuring vessel length in vascular plants: can we divine the  
597 truth? History, theory, methods, and contrasting models. *Trees* **28**: 643-655
- 598 **Cai J, Li S, Zhang HX, Zhang SX, Tyree MT** (2014) Recalcitrant vulnerability curves:  
599 methods of analysis and the concept of fiber bridges for enhanced cavitation  
600 resistance. *Plant Cell Environ* **37**: 35-44
- 601 **Cai J, Zhang S, Tyree MT** (2010) A computational algorithm addressing how vessel  
602 length might depend on vessel diameter. *Plant Cell Environ* **33**: 1234-1238
- 603 **Cochard H, Damour G, Bodet C, Tharwat I, Poirier M, Ameglio T** (2005) Evaluation  
604 of a new centrifuge technique for rapid generation of xylem vulnerability curves.  
605 *Physiol Plantarum* **124**: 410-418
- 606 **Cochard H, Badel E, Herbette S, Delzon S, Choat B, Jansen S** (2013) Methods of  
607 measuring plant vulnerability to cavitation: a critical review. *J Exp Bot* **64**: 4779-  
608 4791
- 609 **Davis SD, Sperry JS, Hacke UG** (1999) The relationship between conduit diameter and  
610 cavitation caused by freezing. *Am J Bot* **86**: 1367-1372
- 611 **Dixon HH, Joly J** (1894) On the ascent of sap. *Philos Trans R Soc Lond B* **186**: 563-576
- 612 **Du G, Feng F, Wang Y, Tyree MT** (2019) Do nano-particles cause recalcitrant  
613 vulnerability curves in *Robinia*? Testing with a four-cuvette Cochard rotor and  
614 with water extraction curves. *Tree Physiol* **39**: 156-165
- 615 **Gleason SM, Westoby M, Jansen S, et al.** (2016) Weak tradeoff between xylem safety  
616 and xylem - specific hydraulic efficiency across the world's woody plant species.  
617 *New Phytol* **209**: 123-136
- 618 **Hacke WU, Sperry JS, Wheeler JK, Castro L** (2006) Scaling of angiosperm xylem  
619 structure with safety and efficiency. *Tree Physiol* **26**: 689-701

- 620 **Martin St-Paul NK, Longepierre D, Huc R, Delzon S, Burlett R, Joffre R, Rambal S,**  
621 **Cochard H** (2014) How reliable are methods to assess xylem vulnerability to  
622 cavitation? The issue of ‘open vessel’ artifact in oaks. *Tree Physiol* **34**: 894-905
- 623 **Pan R, Geng J, Cai J, Tyree MT** (2015) A comparison of two methods for measuring  
624 vessel length in woody plants. *Plant Cell Environ* **38**: 2519-2526
- 625 **Peng GQ, Yang DM, Liang Z, Li JH, Tyree MT** (2019) The quantitative relationship  
626 between water extraction and vulnerability curves. *J Exp Bot* **70**: 4865-4876
- 627 **Pickard WF** (1981) The ascent of sap in plants. *Prog Biophys Mol Bio* **37**: 181-229
- 628 **Pivovarov AL, Burlett R, Lavigne B, Cochard H, Santiago LS, Delzon S** (2016)  
629 Testing the ‘microbubble effect’ using the Cavitron technique to measure xylem  
630 water extraction curves. *AoB Plants* **8**: plw011
- 631 **Sperry JS, Christman MA, Torres-Ruiz JM, Taneda H, Smith DD** (2012)  
632 Vulnerability curves by centrifugation: is there an open vessel artefact, and are 'r'  
633 shaped curves necessarily invalid? *Plant Cell Environ* **35**: 601-610
- 634 **Sperry JS, Hacke UG, Wheeler JK** (2005) Comparative analysis of end wall resistivity  
635 in xylem conduits. *Plant Cell and Environ* **28**: 456-465
- 636 **Torres-Ruiz JM, Cochard H, Mayr S, Beikircher, B, Diaz-Espejo, A, Rodriguez-**  
637 **Dominguez CM, Badel E, Fernández JE** (2014) Vulnerability to cavitation in  
638 *Olea europaea* current-year shoots: further evidence of an open-vessel artifact  
639 associated with centrifuge and air-injection techniques. *Physiol Plantarum* **152**:  
640 465-474
- 641 **Tyree MT, Salleo S, LoGullo MA, Barclay GF, Salleo A, Rosso R** (1982) Osmotically  
642 induced volume changes in protoplasts isolated from *Cucurbita ficifolia*. *Can J Bot*  
643 **60**: 730-736
- 644 **Tyree MT, Dixon MA** (1986) Water stress induced cavitation and embolism in some  
645 woody plants. *Physiol Plantarum* **66**: 397-405
- 646 **Tyree MT, Zimmermann MH** (2002) *Xylem Structure and the Ascent of Sap*. Springer,  
647 New York
- 648 **Tyree MT** (1997) The Cohesion-Tension theory of sap ascent: Current controversies. *J*  
649 *Exp Bot* **48**: 1753-1765

- 650 **Wang R, Zhang L, Zhang S, Cai J, Tyree MT** (2014) Water relations of *Robinia*  
651 *pseudoacacia* L.: Do vessels cavitate and refill diurnally or are R-shaped curves  
652 invalid in *Robinia*? *Plant Cell Environ* **37**: 2667-2678
- 653 **Wheeler J, Sperry JS, Hacke UG, Hoang N** (2005) Inter-vessel pitting and cavitation in  
654 woody *Rosaceae* and other vesselled plants: a basis for safety versus efficiency  
655 trade-off in xylem transport. *Plant Cell Environ* **28**: 800-812
- 656 **Yin PX, Meng F, Liu Q, An R, Cai J, Du GY** (2018) A comparison of two centrifuge  
657 techniques for constructing vulnerability curves: insight into the 'open-vessel'  
658 artifact. *Physiol Plantarum* **165**: 701-710
- 659

660 Table 1. Mean  $\pm$  SE of mean vessel length and vessel diameter of four species. Number  
661 of replicates: N = 6-9. Stems used for VCs measurement in large rotor.

| Species                                  | Mean vessel length (cm) | vessel diameter<br>( $\mu\text{m}$ ) |
|------------------------------------------|-------------------------|--------------------------------------|
| <i>Acer palmatum</i>                     | 2.25 $\pm$ 0.09 a       | 34.95 $\pm$ 1.08 a                   |
| <i>Robinia pseudoacacia</i> <sup>1</sup> | 14.39 $\pm$ 1.40 b      | 47.04 $\pm$ 0.85 b                   |
| <i>Robinia pseudoacacia</i> <sup>2</sup> | 14.55 $\pm$ 1.07 b      | 62.55 $\pm$ 2.17 c                   |
| <i>Quercus acutissima</i>                | 52.64 $\pm$ 2.66 c      | 67.39 $\pm$ 2.84 c                   |

662 NOTE: Different letters in each column means there is significant difference between species  $P < 0.05$ ;  
663 Same letters means no difference between species  $P > 0.05$ . Superscript 1 means samples collected from  
664 Yangling, 2 means samples collected from Jinhua.

665



666

667 Table 2 The comparison of  $T_{50}$  between bench-top dehydration and Sperry-type  
668 centrifugation methods in four species.

| Species                                  | Bench-top dehydration    | Centrifugation    |
|------------------------------------------|--------------------------|-------------------|
|                                          | 95% Confidence intervals | Mean $\pm$ SE     |
| <i>Acer palmatum</i>                     | -3.41 (-3.66, -3.16)     | - 3.24 $\pm$ 0.09 |
| <i>Robinia pseudoacacia</i> <sup>1</sup> | -3.74 (-3.66, -3.16)     | - 1.01 $\pm$ 0.09 |
| <i>Robinia pseudoacacia</i> <sup>2</sup> | -2.25 (-2.47, -2.03)     | - 1.39 $\pm$ 0.09 |
| <i>Quercus acutissima</i>                | -2.11 (-2.29, -1.93)     | - 1.03 $\pm$ 0.06 |

669 NOTE: Superscript 1 means samples collected from Yangling, 2 means samples collected from Jinhua.

670

671

672 Table 3 Statistical analysis for equal and unequal water level, repeat 10 cycles with the  
673 same tension.

| Rotor size  | Water level | Slope                       | Y-intercept              |
|-------------|-------------|-----------------------------|--------------------------|
| Small rotor | equal       | -0.0628(-0.0660, -0.0596) * | 0.9541(0.9344, 0.9739) # |
|             | unequal     | -0.0588(-0.0732, -0.0443) * | 0.7353(0.6457, 0.8249) # |
| Large rotor | equal       | -0.0412(-0.0439, -0.0385) * | 0.8952(0.8785, 0.9912)   |
|             | unequal     | -0.0491(-0.0568, -0.0413) * | 0.8541(0.8060, 0.9023)   |

674 Values in brackets are the 95% confidence range # = significant difference between equal  
675 and unequal values. \* = significant difference between large and small rotor

676

677 **Figure legends**

678 **Fig. 1.** The theoretical profiles of tension in stems versus stem position. Solid line with  
679 circles = tension versus position relative to the center of spin of a centrifuge rotor. The  
680 flat dashed line is the tension versus similar distance during benchtop dehydration of an  
681 excised shoot.

682 **Fig. 2.** The left ordinate axis shows the cross-sectional area of rubber-filled vessels  
683 versus the distance from the injection surface (abscissa); points are the mean of measured  
684 values ( $N = 7$  stems), and the solid line is the best fit curve:  $y = 2.390E-02 \exp(-0.187x)$ ,  
685  $R^2 = 0.9972$ . The right ordinate axis shows the volume of injected rubber from the  
686 injection surface (dashed line) given by the integral of the above equation. The volume is  
687 the maximum volume available to nano-particles that are filtered out by pit membranes  
688 between vessels.

689 **Fig. 3.** (A) Mean vessel diameter of rubber-injected vessels versus the distance from the  
690 injection surface. (B) Mean vessel length versus bin diameter size class. Note that mean  
691 vessel lengths are computed assuming that they randomly begin anywhere in the stem, so  
692 mean vessel lengths tend to exceed the distance of rubber infusion.

693 **Fig. 4.** (A) *Robinia* stems of Yangling in the small rotor were subjected to 10 repeated  
694 spins of 6 min duration, and at the end of each spin, the hydraulic conductivity was  
695 measured. In the open circle points, the water mass in each cuvette was equal to  $\pm 1$  mg or  
696 unequal by exactly 0.5 g (solid triangles). (B) The same as (A) except the stems were  
697 spun in the large rotor and the unequal masses of water were 2 g measured to  $\pm 1$  mg.  
698 Stem lengths in the small and large rotors were 14.4 and 27.5 cm, respectively. (C)  
699 Comparisons of short to long vessel species measured in the large Sperry rotor in Jinhua.

700 **Fig. 5.** Starch in living cells stained with iodine in the cross section for (A) *Acer*, (B)  
701 *Quercus*, and (C) *Robinia*.

702 **Fig. 6.** Vulnerability curves of *Robina* in Yangling by the traditional method and by the  
703 one-stem-one-tension method in (A) the small rotor, and (B) the large rotor. The  
704 vulnerability curves with the open circles and dashed line were obtained by the traditional  
705 way, where  $N=6$  stems were centrifuged at each tension measured for PLC determination

706 and then centrifuged again at each tension point on the curve. In the closed circles and  
707 solid line, different stems were spun at each tension and discarded after each  
708 measurement. The duration of centrifugation for each point was 6 minutes. The dotted  
709 line with diamonds in (B) gives the computed VC by the staining method evaluated at the  
710 axis of rotation without correction for ‘background’ embolism. Straight vertical lines  
711 shown  $T_{50}$  values for each method.

712 **Fig. 7.** This is a replot and reanalysis of data from Wang *et al.* (2014) stem segment  
713 where hydraulic conductivity was repeatedly measured at low tension (0.072 MPa). (A)  
714 A typical example for a > 3 h of repeated measurements until a stable  $K_h$  was observed  
715 (open circles); the squares are the same plot but for the first 30 minutes (the top x-axis).  
716 (B) The final  $K_h$  is plotted as percentage of the initial  $K_h$  on the y-axis versus the x-axis  
717 which plots the mean vessel length measured in the stem segment immediately after the  
718  $K_h$  values were measured. The stem segments lengths used were always 27.4 cm long; the  
719 trend line show a significant loss of  $K_h$  whenever the mean vessel length was > about  $\frac{1}{4}$   
720 the stem segment length. All points are for *Robinia* which has a high variability of vessel  
721 length from between trees and even stems within a tree.

722 **Fig. 8.** This is a radial view of a stem near the cross-sectional cut surface showing only  
723 one vessel and two living cells (wood fiber cells, etc., not shown). This is a diagrammatic  
724 representation of the origin of nano-particles (black circles) emerging from living cells  
725 cut open at the stem surface. Yellow arrows indicate osmotically induced flow, and black  
726 arrows indicate pressure-driven flow. See text for details.

727 **Fig. 9.** A replot of data collected using the large Sperry rotor (Fig. 4B) together with  
728 vulnerability curves collected by methods that should be immune to the early embolism  
729 by nano-particles. The dash-dotted line was obtained by the bench top dehydration  
730 method; stems are not flushed before dehydration, so no nano-particles are pushed into  
731 vessels (reproduced from Wang *et al.* 2014, also Yin *et al.* 2018 obtained similar results).  
732 The dotted line was obtained by the water extraction method (dotted Peng *et al.* 2019),  
733 which tends to push nano-particles away from the axis of rotation. Horizontal bars are 95%  
734 confidence interval of  $T_{50}$  by One tension one stem measurement in Sperry Centrifuge  
735 (gray) and Bench-top dehydration method (black) in Yangling.

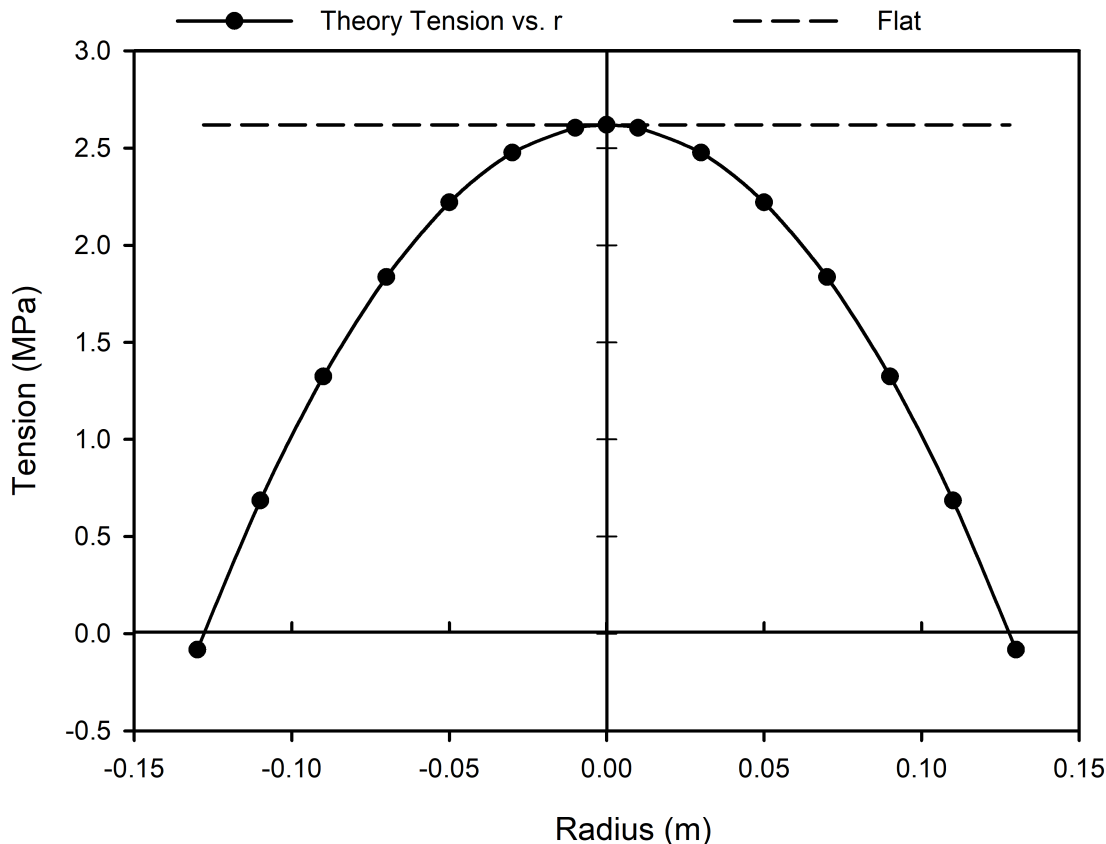

Fig. 1. The theoretical profiles of tension in stems versus stem position. Solid line with circles = tension versus position relative to the center of spin of a centrifuge rotor. The flat dashed line is the tension versus similar distance during benchtop dehydration of an excised shoot.

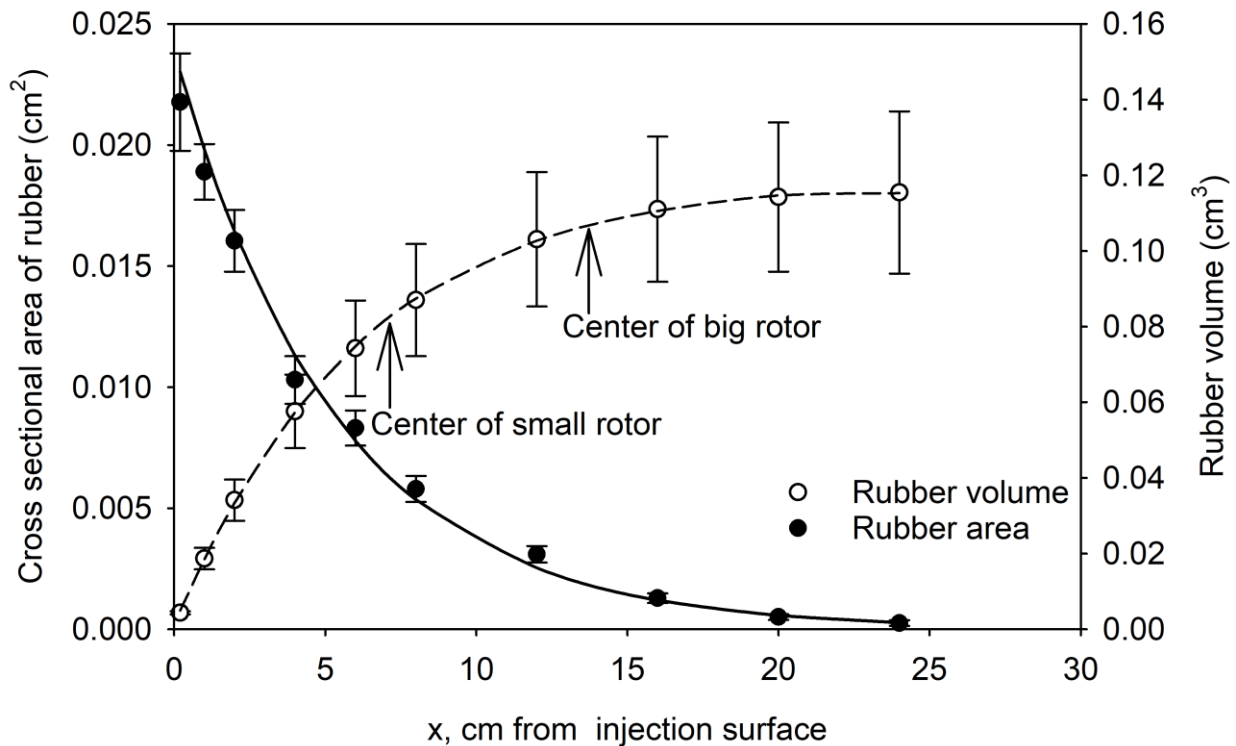

**Fig. 2.** The left ordinate axis shows the cross-sectional area of rubber-filled vessels versus the distance from the injection surface (abscissa); points are the mean of measured values ( $N = 7$  stems), and the solid line is the best fit curve:  $y = 2.390E-02 \exp(-0.187x)$ ,  $R^2 = 0.9972$ . The right ordinate axis shows the volume of injected rubber from the injection surface (dashed line) given by the integral of the above equation. The volume is the maximum volume available to nano-particles that are filtered out by pit membranes between vessels.

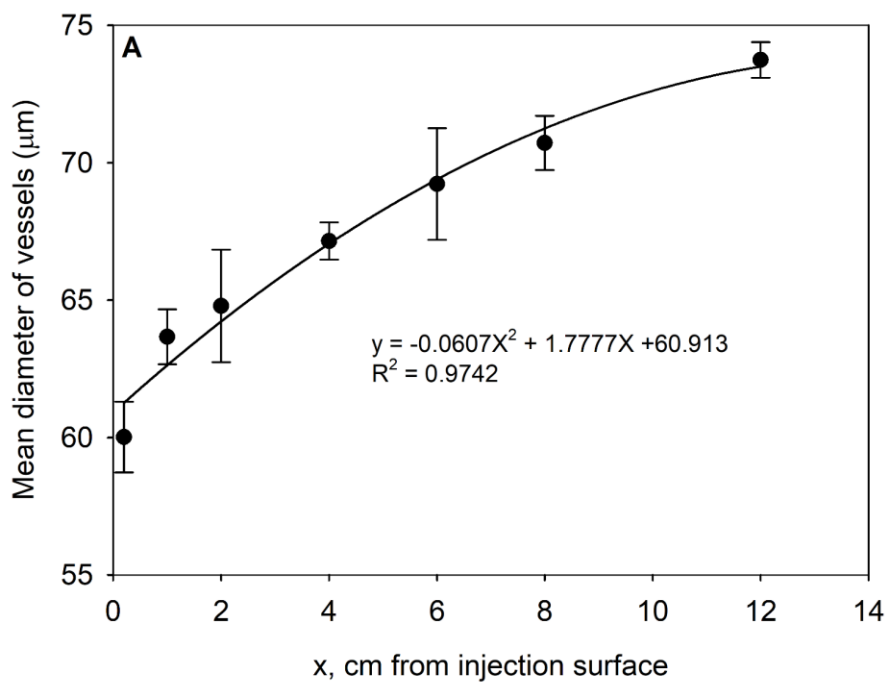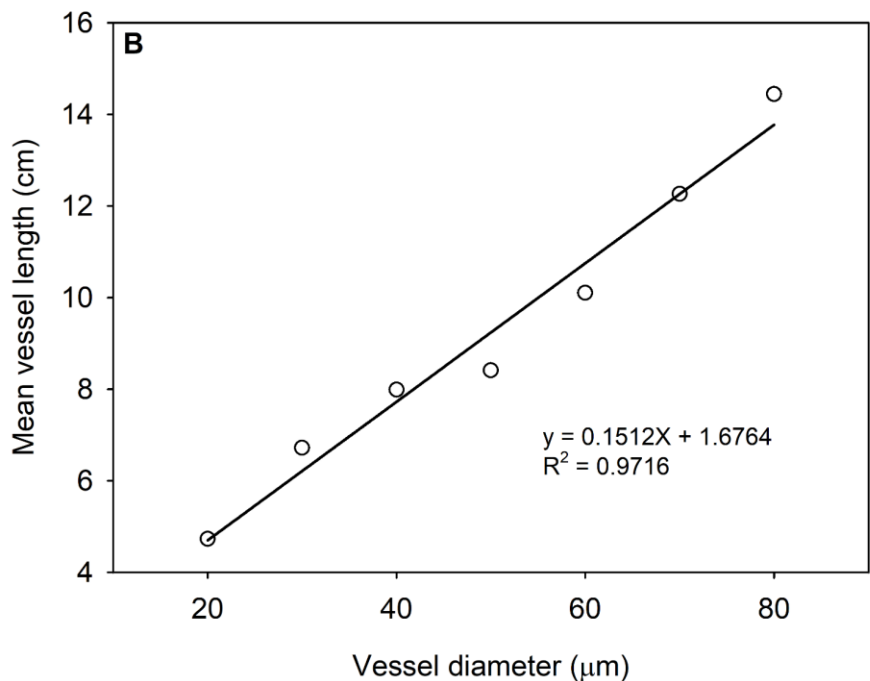

**Fig. 3.** (A) Mean vessel diameter of rubber-injected vessels versus the distance from the injection surface. (B) Mean vessel length versus bin diameter size class. Note that mean vessel lengths are computed assuming that they randomly begin anywhere in the stem, so mean vessel lengths tend to exceed the distance of rubber infusion.

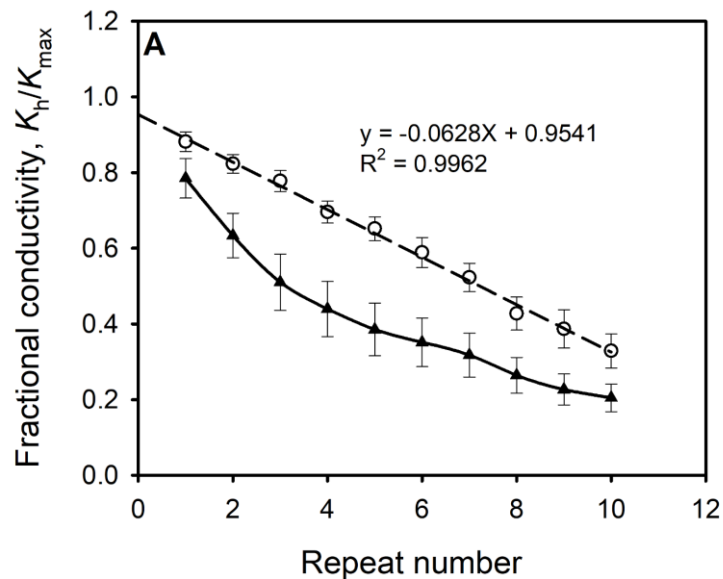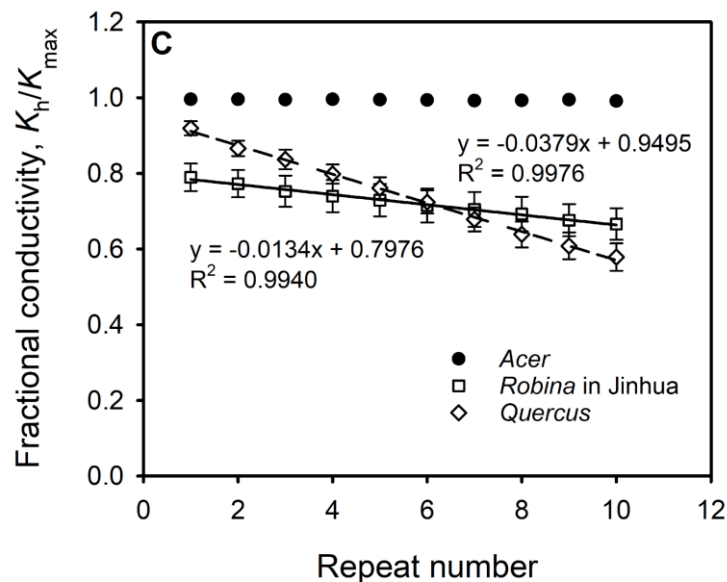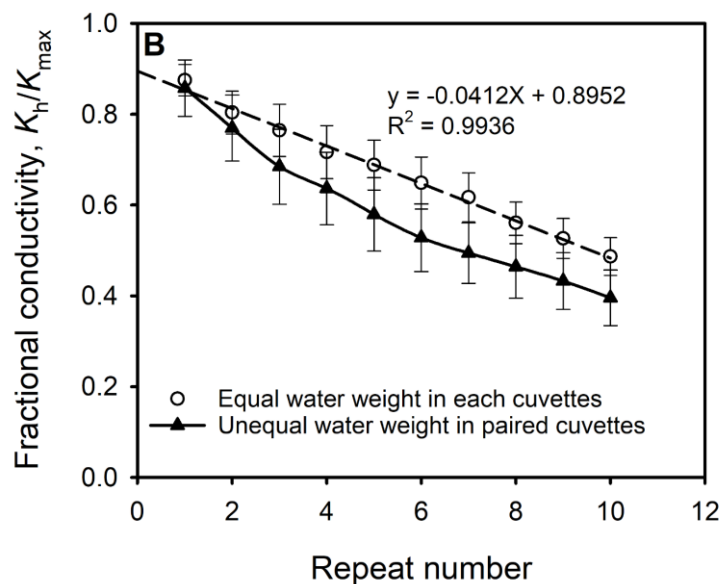

**Fig. 4.** (A) *Robinia* stems of Yangling in the small rotor were subjected to 10 repeated spins of 6 min duration, and at the end of each spin, the hydraulic conductivity was measured. In the open circle points, the water mass in each cuvette was equal to  $\pm 1$  mg or unequal by exactly 0.5 g (solid triangles). (B) The same as (A) except the stems were spun in the large rotor and the unequal masses of water were 2 g measured to  $\pm 1$  mg. Stem lengths in the small and large rotors were 14.4 and 27.5 cm, respectively. (C) Comparisons of short to long vessel species measured in the large Sperry rotor in Jinhua.



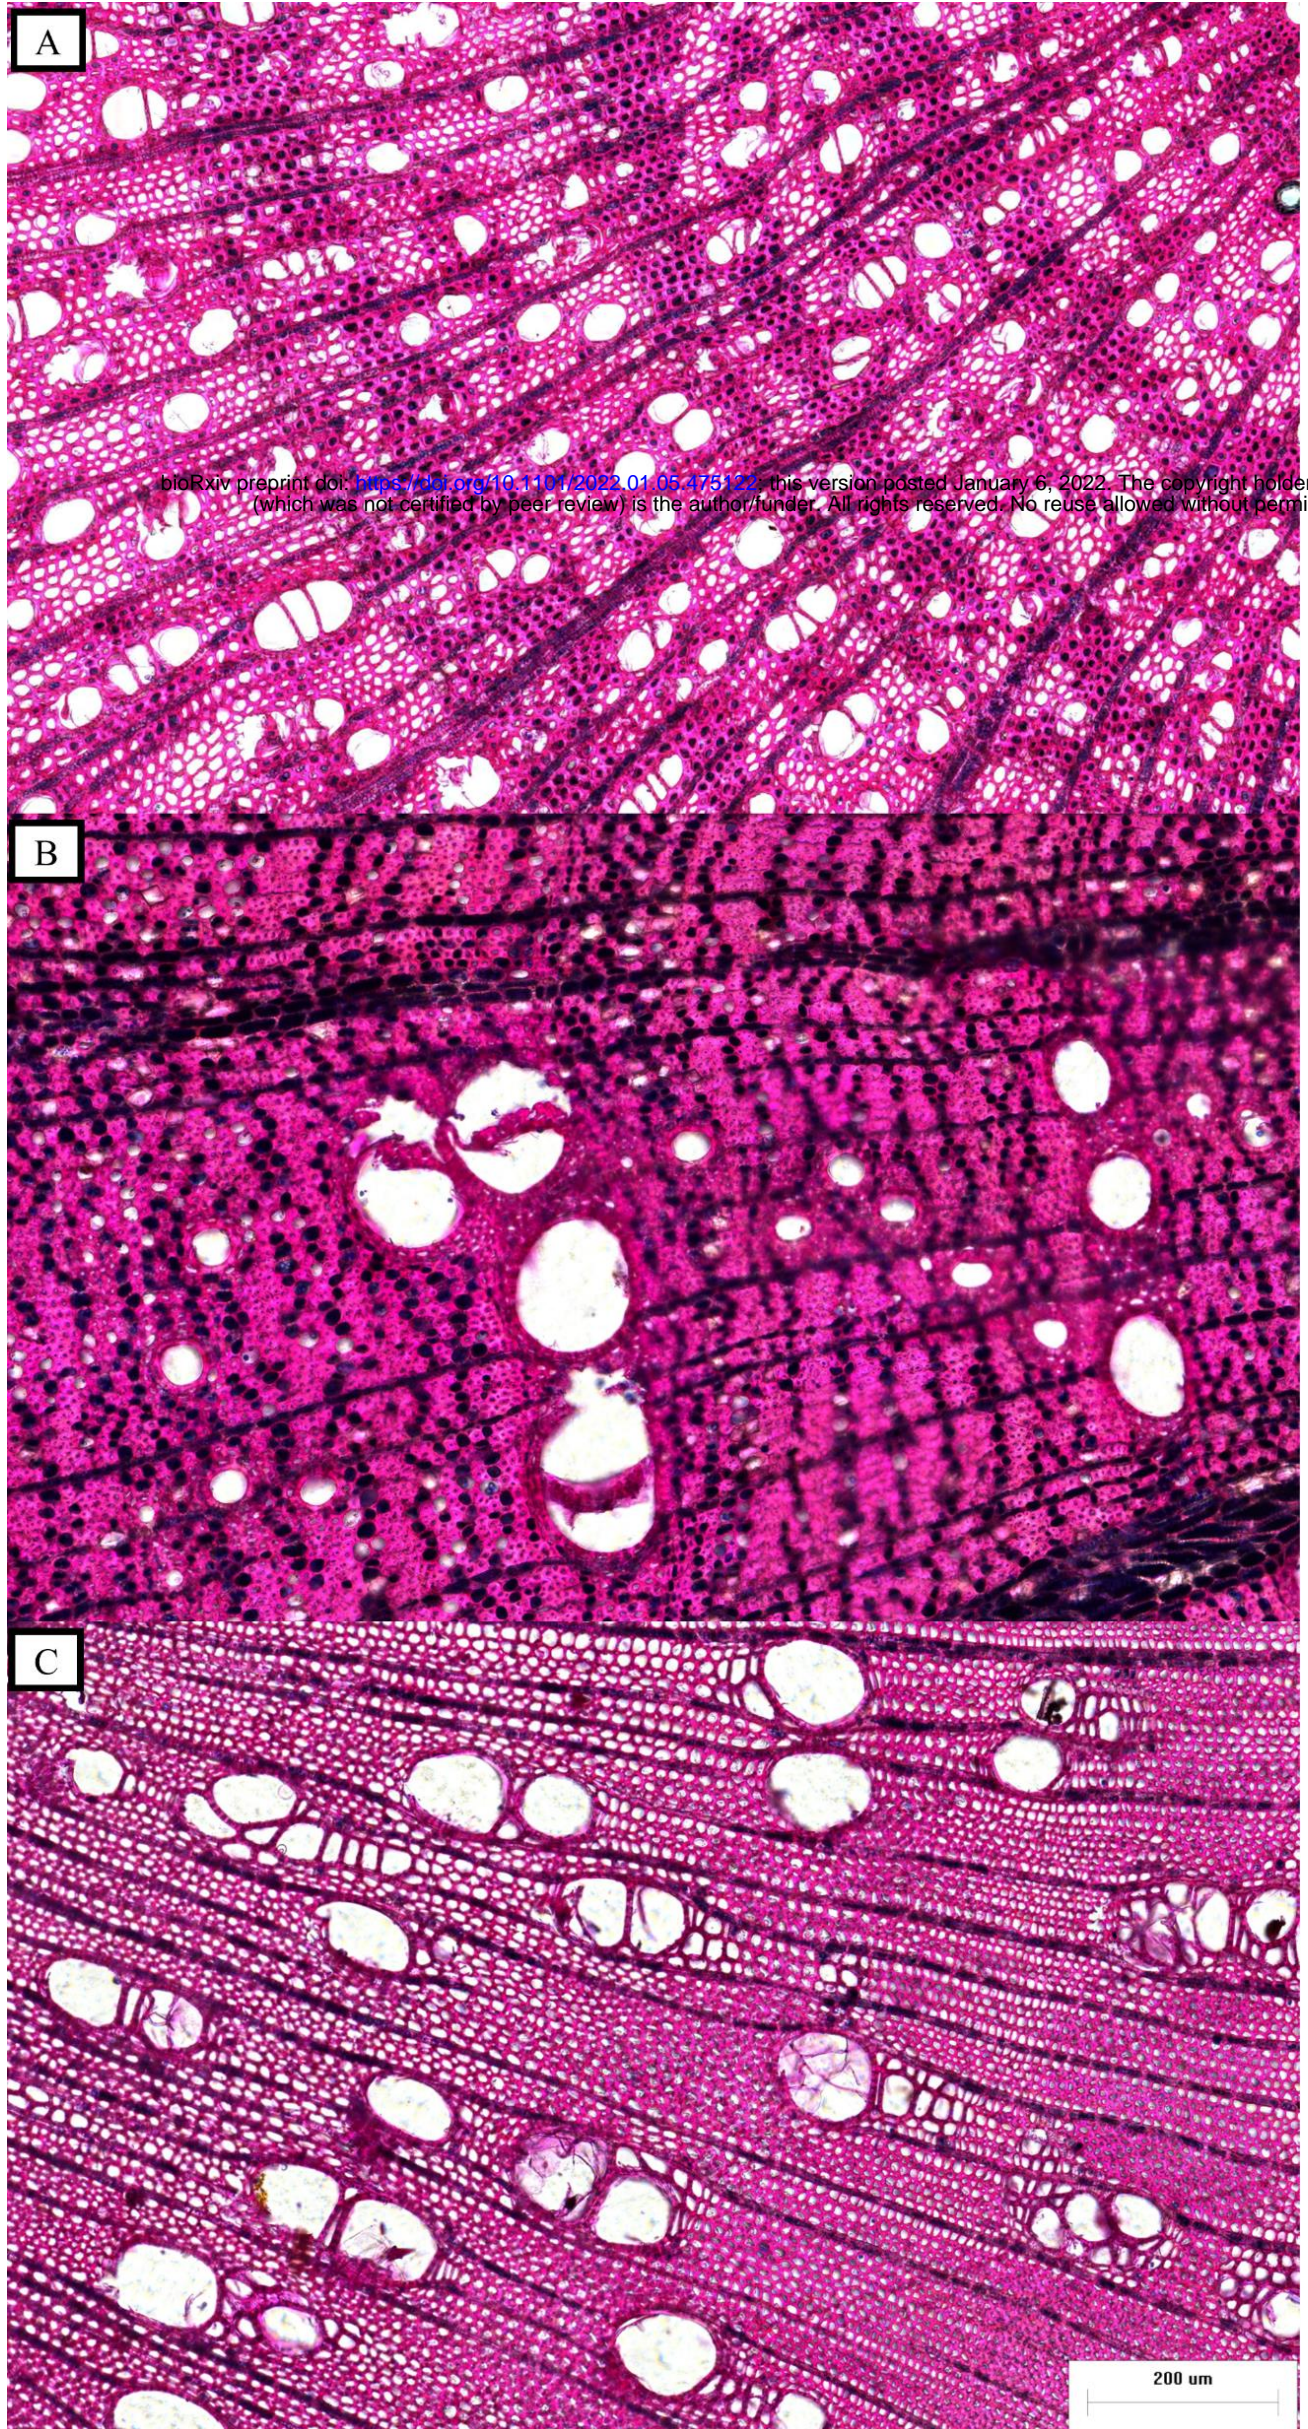

**Fig. 5.** Starch in living cells stained with iodine in the cross section for (A) *Acer*, (B) *Quercus*, and (C) *Robinia*.

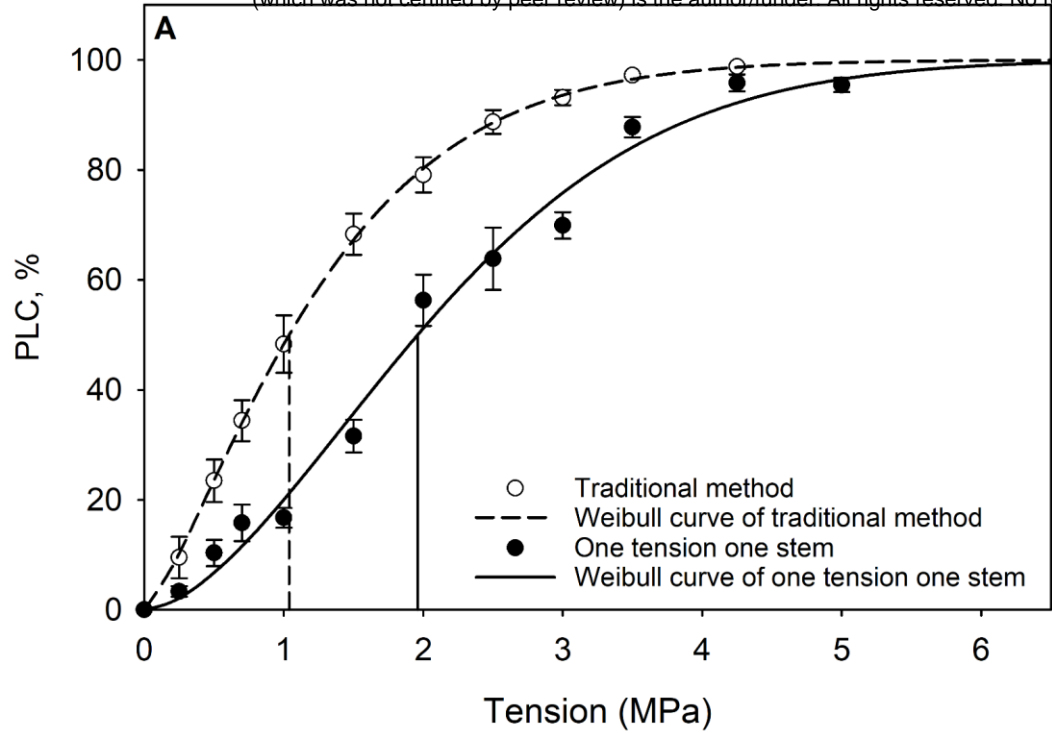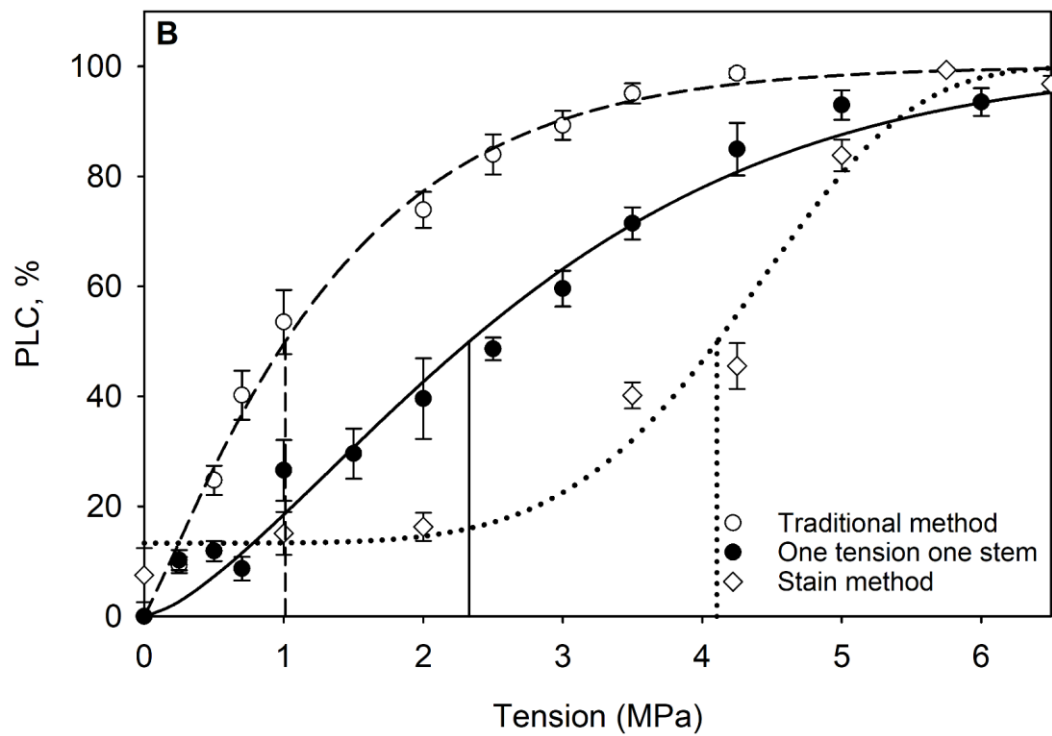

**Fig. 6.** Vulnerability curves of *Robina* in Yangling by the traditional method and by the one-stem-one-tension method in (A) the small rotor, and (B) the large rotor. The vulnerability curves with the open circles and dashed line were obtained by the traditional way, where N=6 stems were centrifuged at each tension measured for PLC determination and then centrifuged again at each tension point on the curve. In the closed circles and solid line, different stems were spun at each tension and discarded after each measurement. The duration of centrifugation for each point was 6 minutes. The dotted line with diamonds in (B) gives the computed VC by the staining method evaluated at the axis of rotation without correction for ‘background’ embolism. Straight vertical lines shown  $T_{50}$  values for each method.

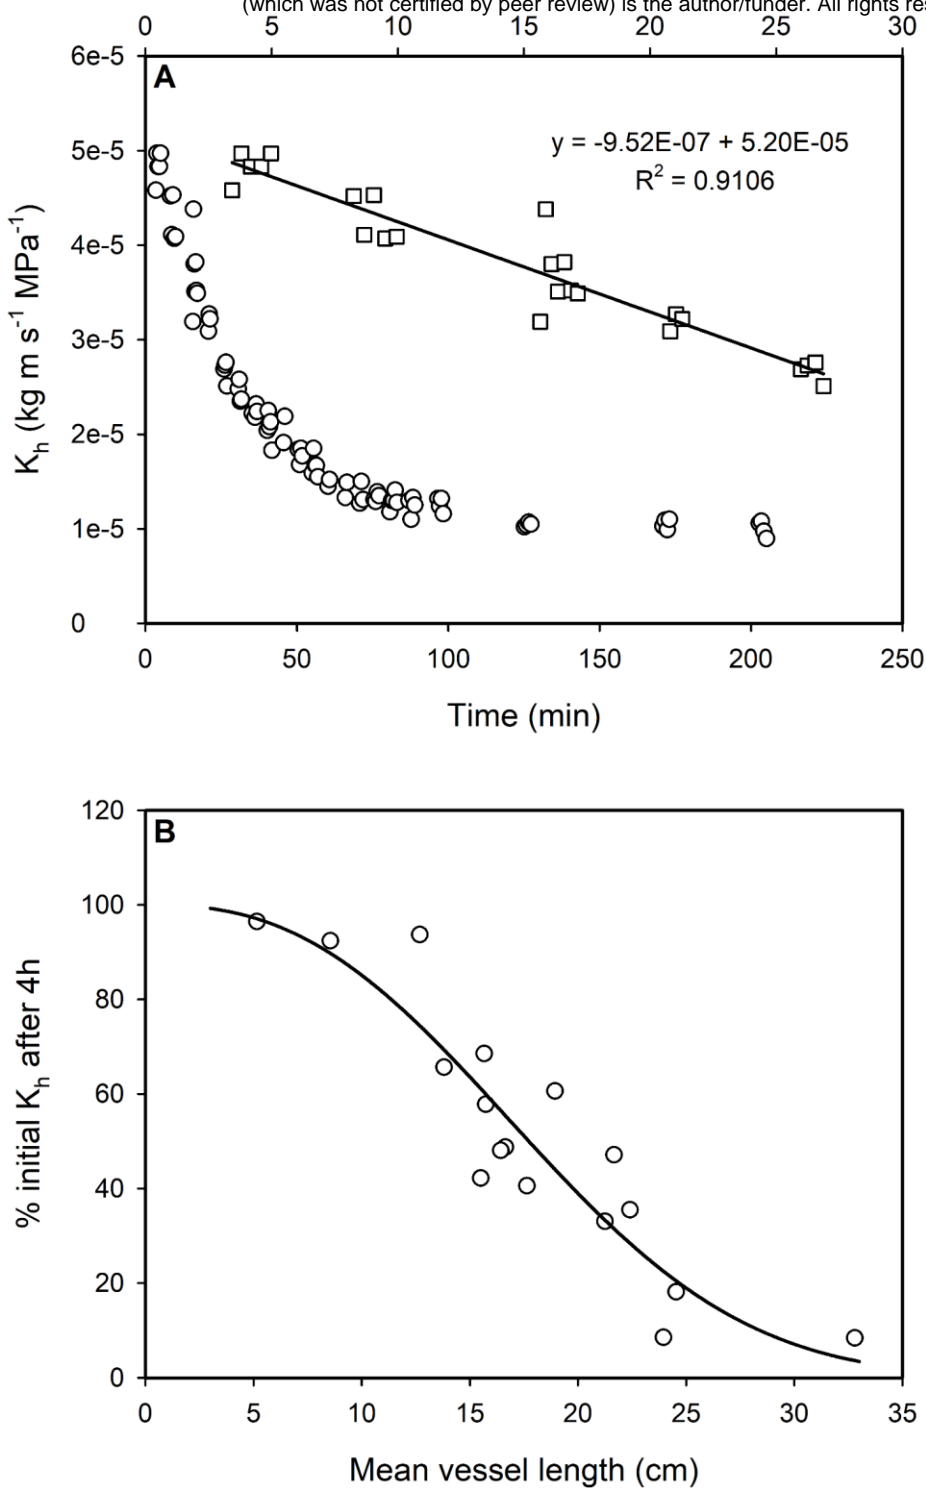

**Fig. 7.** This is a replot and reanalysis of data from Wang *et al.* (2014) stem segment where hydraulic conductivity was repeatedly measured at low tension (0.072 MPa). (A) A typical example for a > 3 h of repeated measurements until a stable  $K_h$  was observed (open circles); the squares are the same plot but for the first 30 minutes (the top x-axis). (B) The final  $K_h$  is plotted as percentage of the initial  $K_h$  on the y-axis versus the x-axis which plots the mean vessel length measured in the stem segment immediately after the  $K_h$  values were measured. The stem segments lengths used were always 27.4 cm long; the trend line show a significant loss of  $K_h$  whenever the mean vessel length was > about  $\frac{1}{4}$  the stem segment length. All points are for *Robinia* which has a high variability of vessel length from between trees and even stems within a tree.

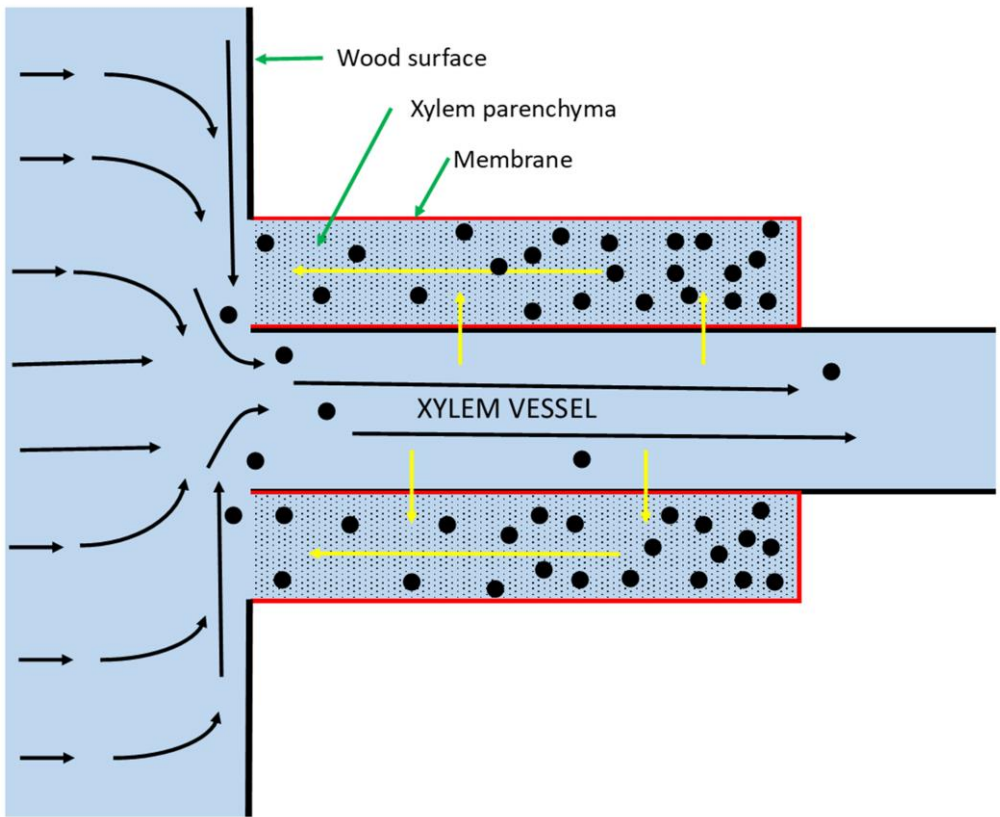

**Fig. 8.** This is a radial view of a stem near the cross-sectional cut surface showing only one vessel and two living cells (wood fiber cells, etc., not shown). This is a diagrammatic representation of the origin of nano-particles (black circles) emerging from living cells cut open at the stem surface. Yellow arrows indicate osmotically induced flow, and black arrows indicate pressure-driven flow. See text for details.

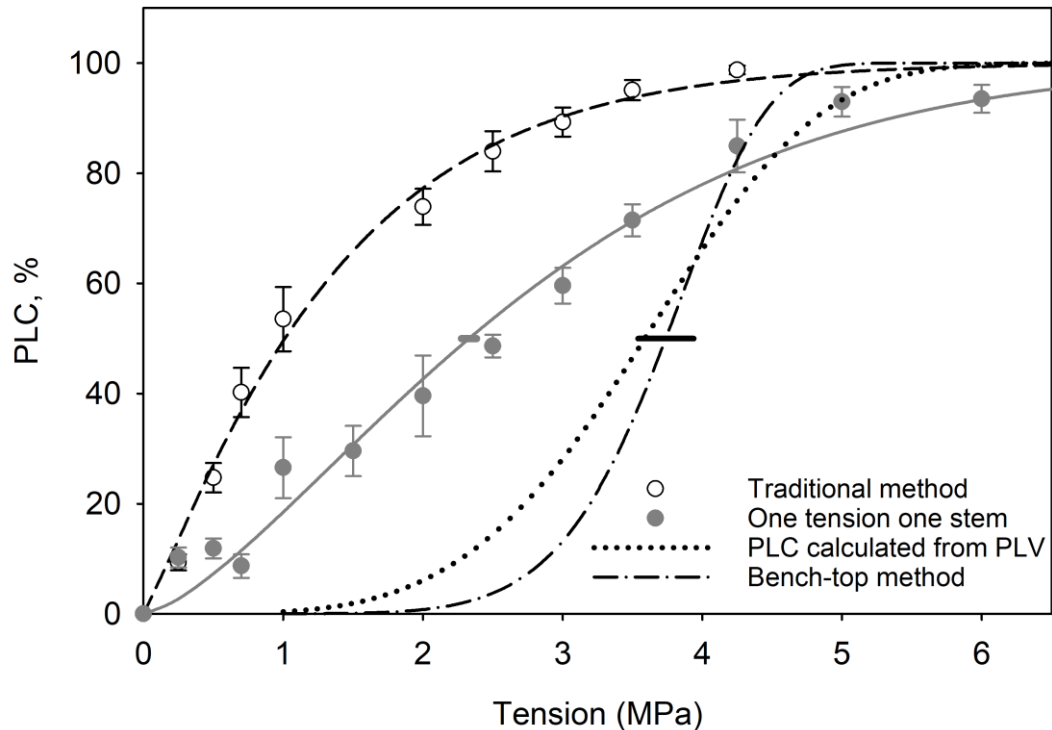

**Fig. 9.** A replot of data collected using the large Sperry rotor (Fig. 4B) together with vulnerability curves collected by methods that should be immune to the early embolism by nano-particles. The dash-dotted line was obtained by the bench top dehydration method; stems are not flushed before dehydration, so no nano-particles are pushed into vessels (reproduced from Wang *et al.* 2014, also Yin *et al.* 2018 obtained similar results). The dotted line was obtained by the water extraction method (dotted Peng *et al.* 2019), which tends to push nano-particles away from the axis of rotation. Horizontal bars are 95% confidence interval of  $T_{50}$  by One tension one stem measurement in Sperry Centrifuge (gray) and Bench-top dehydration method (black) in Yangling.

## Parsed Citations

**Alder NN, Pockman WT, Sperry JS, Nuismer S (1997) Use of centrifugal force in the study of xylem cavitation. J Exp Bot 48: 665-674**

Google Scholar: [Author Only](#) [Title Only](#) [Author and Title](#)

**Briggs LJ (1950) Limiting negative pressure of water. J Appl Phys 21: 721-722**

Google Scholar: [Author Only](#) [Title Only](#) [Author and Title](#)

**Cai J, Tyree MT (2010) The impact of vessel size on vulnerability curves: data and models for within-species variability in saplings of aspen, *Populus tremuloides* Michx. Plant Cell Environ 33: 1059-1069**

Google Scholar: [Author Only](#) [Title Only](#) [Author and Title](#)

**Cai J, Tyree MT (2014) Measuring vessel length in vascular plants: can we divine the truth? History, theory, methods, and contrasting models. Trees 28: 643-655**

Google Scholar: [Author Only](#) [Title Only](#) [Author and Title](#)

**Cai J, Li S, Zhang HX, Zhang SX, Tyree MT (2014) Recalcitrant vulnerability curves: methods of analysis and the concept of fiber bridges for enhanced cavitation resistance. Plant Cell Environ 37: 35-44**

Google Scholar: [Author Only](#) [Title Only](#) [Author and Title](#)

**Cai J, Zhang S, Tyree MT (2010) A computational algorithm addressing how vessel length might depend on vessel diameter. Plant Cell Environ 33: 1234-1238**

Google Scholar: [Author Only](#) [Title Only](#) [Author and Title](#)

**Cochard H, Damour G, Bodet C, Tharwat I, Poirier M, Ameglio T (2005) Evaluation of a new centrifuge technique for rapid generation of xylem vulnerability curves. Physiol Plantarum 124: 410-418**

Google Scholar: [Author Only](#) [Title Only](#) [Author and Title](#)

**Cochard H, Badel E, Herbette S, Delzon S, Choat B, Jansen S (2013) Methods of measuring plant vulnerability to cavitation: a critical review. J Exp Bot 64: 4779-4791**

Google Scholar: [Author Only](#) [Title Only](#) [Author and Title](#)

**Davis SD, Sperry JS, Hacke UG (1999) The relationship between conduit diameter and cavitation caused by freezing. Am J Bot 86: 1367-1372**

Google Scholar: [Author Only](#) [Title Only](#) [Author and Title](#)

**Dixon HH, Joly J (1894) On the ascent of sap. Philos Trans R Soc Lond B 186: 563-576**

Google Scholar: [Author Only](#) [Title Only](#) [Author and Title](#)

**Du G, Feng F, Wang Y, Tyree MT (2019) Do nano-particles cause recalcitrant vulnerability curves in Robinia? Testing with a four-cuvette Cochard rotor and with water extraction curves. Tree Physiol 39: 156-165**

Google Scholar: [Author Only](#) [Title Only](#) [Author and Title](#)

**Gleason SM, Westoby M, Jansen S, et al. (2016) Weak tradeoff between xylem safety and xylem-specific hydraulic efficiency across the world's woody plant species. New Phytol 209: 123-136**

Google Scholar: [Author Only](#) [Title Only](#) [Author and Title](#)

**Hacke WJ, Sperry JS, Wheeler JK, Castro L (2006) Scaling of angiosperm xylem structure with safety and efficiency. Tree Physiol 26: 689-701**

Google Scholar: [Author Only](#) [Title Only](#) [Author and Title](#)

**Martin St-Paul NK, Longepierre D, Huc R, Delzon S, Burrett R, Joffre R, Rambal S, Cochard H (2014) How reliable are methods to assess xylem vulnerability to cavitation? The issue of 'open vessel' artifact in oaks. Tree Physiol 34: 894-905**

Google Scholar: [Author Only](#) [Title Only](#) [Author and Title](#)

**Pan R, Geng J, Cai J, Tyree MT (2015) A comparison of two methods for measuring vessel length in woody plants. Plant Cell Environ 38: 2519-2526**

Google Scholar: [Author Only](#) [Title Only](#) [Author and Title](#)

**Peng GQ, Yang DM, Liang Z, Li JH, Tyree MT (2019) The quantitative relationship between water extraction and vulnerability curves. J Exp Bot 70: 4865-4876**

Google Scholar: [Author Only](#) [Title Only](#) [Author and Title](#)

**Pickard WF (1981) The ascent of sap in plants. Prog Biophys Mol Bio 37: 181-229**

Google Scholar: [Author Only](#) [Title Only](#) [Author and Title](#)

**Pivovarov AL, Burrett R, Lavigne B, Cochard H, Santiago LS, Delzon S (2016) Testing the 'microbubble effect' using the Cavitron technique to measure xylem water extraction curves. AoB Plants 8: plw011**

Google Scholar: [Author Only](#) [Title Only](#) [Author and Title](#)

**Sperry JS, Christman MA, Torres-Ruiz JM, Taneda H, Smith DD (2012) Vulnerability curves by centrifugation: is there an open vessel artefact, and are 'r' shaped curves necessarily invalid? Plant Cell Environ 35: 601-610**

Google Scholar: [Author Only](#) [Title Only](#) [Author and Title](#)

**Sperry JS, Hacke UG, Wheeler JK (2005) Comparative analysis of end wall resistivity in xylem conduits. Plant Cell and Environ 28: 456-465**

Google Scholar: [Author Only](#) [Title Only](#) [Author and Title](#)

**Torres-Ruiz JM, Cochard H, Mayr S, Beikircher, B, Diaz-Espejo, A, Rodriguez-Dominguez CM, Badel E, Fernández JE (2014) Vulnerability to cavitation in Olea europaea current-year shoots: further evidence of an open-vessel artifact associated with centrifuge and air-injection techniques. Physiol Plantarum 152: 465-474**

Google Scholar: [Author Only](#) [Title Only](#) [Author and Title](#)

**Tyree MT, Salleo S, LoGullo MA, Barclay GF, Salleo A, Rosso R (1982) Osmotically induced volume changes in protoplasts isolated from Cucurbita ficifolia. Can J Bot 60: 730-736**

Google Scholar: [Author Only](#) [Title Only](#) [Author and Title](#)

**Tyree MT, Dixon MA (1986) Water stress induced cavitation and embolism in some woody plants. Physiol Plantarum 66: 397-405**

Google Scholar: [Author Only](#) [Title Only](#) [Author and Title](#)

**Tyree MT, Zimmermann MH (2002) Xylem Structure and the Ascent of Sap. Springer, New York**

Google Scholar: [Author Only](#) [Title Only](#) [Author and Title](#)

**Tyree MT (1997) The Cohesion-Tension theory of sap ascent: Current controversies. J Exp Bot 48: 1753-1765**

Google Scholar: [Author Only](#) [Title Only](#) [Author and Title](#)

**Wang R, Zhang L, Zhang S, Cai J, Tyree MT (2014) Water relations of Robina pseudoacacia L.: Do vessels cavitate and refill diurnally or are R-shaped curves invalid in Robinia? Plant Cell Environ 37: 2667-2678**

Google Scholar: [Author Only](#) [Title Only](#) [Author and Title](#)

**Wheeler J, Sperry JS, Hacke UG, Hoang N (2005) Inter-vessel pitting and cavitation in woody Rosaceae and other vesselled plants: a basis for safety versus efficiency trade-off in xylem transport. Plant Cell Environ 28: 800-812**

Google Scholar: [Author Only](#) [Title Only](#) [Author and Title](#)

**Yin PX, Meng F, Liu Q, An R, Cai J, Du GY (2018) A comparison of two centrifuge techniques for constructing vulnerability curves: insight into the 'open-vessel' artifact. Physiol Plantarum 165: 701-710**

Google Scholar: [Author Only](#) [Title Only](#) [Author and Title](#)
